# Supplementary material for: Structural modification of zolpidem led to potent antimicrobial activity in imidazo[1,2-a]pyridine/pyrimidine-1,2,3-triazoles
Source: Royal Society of Chemistry journal article supplement (doi:10.1039/c9nj03462e), 2019-01-01
Supplement: c9nj03462e1.pdf [file c9nj03462e1.pdf]

## Supporting Information

### Structural modification of zolpidem resulted potent antimicrobial activity in imidazo[1,2-*a*]pyridine/pyrimidine-1,2,3-triazoles

Rajkumar Reddyrajula <sup>a</sup>, Udayakumar Dalimba <sup>a\*</sup>

<sup>a</sup>Organic Chemistry Laboratory, Department of Chemistry, National Institute of Technology Karnataka, Surathkal, Srinivasanagar, Mangalore-575025, India.

\*Corresponding author email: [udayaravi80@gmail.com](mailto:udayaravi80@gmail.com), [udayakumar@nitk.ac.in](mailto:udayakumar@nitk.ac.in)

#### Table of contents

1. **Materials and instruments.**
2. **Antitubercular activity.**
3. **Antibacterial activity.**
4. **Antifungal activity.**
5. ***In vitro* cytotoxicity.**
6. **Molecular docking.**
7. **Representative NMR and ESI-Mass spectra of compounds.**

#### 1. Materials and instruments

All the required reagents and solvents were purchased from Sigma Aldrich, Alfa-aesar, Merck and Spectrochem chemical companies, and were used as such without any purification. Silica gel (merck, 60-120 mesh) was used in column chromatography for purification of reaction products. Reaction was monitored with TLC (Merck KGaA) coated with 60 F254 silica gel and accomplished under UV light. Melting point was recorded on a Stuart SMP3 melting point instrument and is uncorrected. <sup>1</sup>H-NMR and <sup>13</sup>C-NMR spectra of synthesized compounds were recorded on Bruker (400 MHz: <sup>1</sup>H-NMR, 100 MHz: <sup>13</sup>C-NMR) spectrometer with TMS as an internal reference. The ESI mass spectra were recorded on waters micro mass Q-Tofmicrospectrometer with an ESI source. Elemental analysis was done using a Thermo electron corporation EA-112 series C, H, N, S analyzer.

## 2. Antitubercular activity

All the title compounds were screened for their antitubercular activity against *M. tuberculosis* using microplate alamar blue assay (MABA) method, which is non-toxic and uses a thermally stable cell permeable reagent (resazurin). Briefly, to reduce the medium evaporation in the test wells while incubation, 200  $\mu\text{L}$  of sterile deionized water was added to all test wells of sterile 96-well plates. The target compounds and standard drugs were prepared in two-fold dilutions (50.0, 25.0, 12.5, 6.25, 3.13, 1.56, 0.78 and 0.4  $\mu\text{g}/\text{mL}$ ) by dissolving in DMSO. 100  $\mu\text{L}$  of the Middlebrook 7H9 broth (MB) with OADC(oleic acid, albumin, dextrose and catalase; Difco) and 100  $\mu\text{L}$  of *M. tuberculosis* H37Rv (ATCC27294) inoculum was supplemented into 7H9 broth wells containing 10-fold serial dilutions of drugs per mL. The tubes were covered with para film and incubated at 37 °C for five days. To this, 10% tween 80 (1:1 mixture) and 25 $\mu\text{L}$  of a freshly prepared alamar blue reagent was added. Then incubated for further 24 hours. The minimal inhibition concentration (MIC) was defined as the lowest concentration of a compound, which prevented a visible growth of bacteria by colour change from blue to pink. This method is similar to that recommended by the National Committee for Clinical Laboratory Standards for the determination of MIC in triplicate.

## 3. Antibacterial activity

The final compounds were evaluated for antibacterial activity against several bacterial strains using the disc diffusion method by measuring the zone of inhibition. Three bacterial strains namely *Staphylococcus aureus*, *Pseudomonas aeruginosa* and *Escherichia coli* were cultivated in brain heart infusion agar medium for 24 h. The culture suspensions were prepared and adjusted by comparing against 0.5 McFarland turbidity standard tubes. The hollow tube of 5 mm diameter was taken and heated. Press it on above inoculated Agar plate and remove it immediately by making a well in the plate. Likewise, make five well on each plate. All the compounds were dissolved in DMSO and appropriate dilutions (75, 50, 25 and 10  $\mu\text{L}$ ) were made with the help of micropipette and added to respective wells. DMSO was used as a solvent and as control. After the inoculation of organism and compound, the petri plates were incubated for 18-24 h at 37 °C. Inhibition zones formed on the medium were evaluated in millimeter (mm). The negative solvent control (DMSO) did not show any antimicrobial activity. Studies were performed in triplicate and the average reading was taken. Inhibition zones were compared with those of the reference discs.

#### 4. Antifungal activity.

The final compounds were screened for antifungal activity against *c. albicans*, *a. niger* and *a. flavus* fungal strains using the disc diffusion method by measuring the zone of inhibition. All these fungal strains were cultivated in Sabouraud agar medium for 24 h. Similar protocol was followed as antibacterial study. For Facultative anaerobes, incubate plates were taken in the Co2 Jar and kept the jar in the incubator at 37 °C whereas for Anaerobic organisms, incubate plates were kept in the Anaerobic jar and kept the jar in the incubator at 37 °C. As like bacterial study, the plates were then examined for the presence of zones of inhibition and the results were recorded.

#### 5. In vitro cytotoxicity

The VERO cell lines (African green monkey kidney: Cat. no. 11965-092) were purchased from National Centre for Cell Sciences (NCCS), Pune, India. The cell lines were seeded in 96 well flat-bottom microtiter plates accommodating DMEM media which was supplemented with 10% heat inactivated fetal calf serum (FBS) and also added 1% Antibiotic-Antimycotic 100X solution. The cells were incubated at 37 °C (95% humidity and 5% CO<sub>2</sub>) for 24 hours. The test compounds were prepared in different concentrations (500, 250, 125, 62.5, 31.25 µg/mL) by dissolving in distilled DMSO. The cells were then treated to different concentrations of drug and were incubated for another 72 hours. The cells in well were washed twice with phosphate buffer solution, stock solution of MTT (20 µL, 5mg/mL in sterile PBS) was added to each well and cells were incubated for additional 4h at 5% CO<sub>2</sub> atmosphere. After the supernatant was flicked off from the incubator, 100 µL of dimethyl sulfoxide was added to dissolve the formazan crystals. Absorbance of wells containing cells and blanks was recorded with a 570 nm using micro plate reader. Percentage of growth inhibition was calculated from below equation. IC<sub>50</sub> value of the compounds was calculated by graph Pad Prism Version5.1.

$$\% \text{ Growth Inhibition} = \frac{\text{Mean OD of test compounds}}{\text{Mean OD of Negative control}} \times 100$$

## 6. Molecular docking

The 3D crystal structure of InhA (PDB Id: 4TZK) of *M. tuberculosis* were obtained from Protein Data Bank for docking explorations. The proteins for docking were prepared by removing the co-crystallized ligand, heteroatoms and water molecules etc. The molecules were docked within the active site of InhA using Auto-dock Vina 1.1.2 software.

**Table S1. Docking score and interacting amino acid residues of the active compounds.**

| Comp. | 4TZK                      |                                            |
|-------|---------------------------|--------------------------------------------|
|       | Docking score<br>Kcal/mol | Interactions                               |
| 4a    | -9.6                      | Lys 165, Tyr 158, Phe 149                  |
| 4b    | -9.8                      | Lys 165, Tyr 158, Phe 149, Ser 94          |
| 4c    | -9.2                      | Tyr 158, Lys 165, Gly 96, Leu 197, Ala 198 |
| 4e    | -9.8                      | Lys 165, Tyr 158, Ser 94, Ser 20           |
| 4f    | -9.9                      | Lys 165, Phe 149, Gly 104                  |
| 4h    | -9.5                      | Tyr 158, Phe 149, Ser 194                  |
| 4j    | -9.6                      | Tyr 158, Phe 149, Gly 104, Ser 94          |
| 4l    | -9.0                      | Lys 165, Tyr 158, Phe 149, Gly 104, Ser 94 |
| 8a    | -9.4                      | Tyr 158, Gly 96, Val 65                    |
| 8b    | -9.4                      | Tyr 158, Phe 149, Val 65                   |
| 8c    | -9.4                      | Ala 198, Tyr 158, Gly 96, Thr 17           |
| 8d    | -9.2                      | Tyr 158, Gly 96                            |
| 8e    | -10.1                     | Thr 196, Ser 20                            |
| 8h    | -9.9                      | Phe 149, Lys 165                           |
| 8j    | -9.3                      | Lys 165, Tyr 158, Phe 149, Ser 94          |
| 8k    | -9.4                      | Thr 196, Tyr 158, Phe 149, Ser 20          |
| 13a   | -10.2                     | Tyr 158, Phe 149, Thr 17                   |
| 13b   | -10.4                     | Ile 194, Tyr 158                           |
| 13f   | -10.0                     | Tyr 158, Thr 17                            |
| 13h   | -10.1                     | Ile 194, Tyr 158                           |

## 7. Representative NMR and ESI-Mass spectra of compounds.

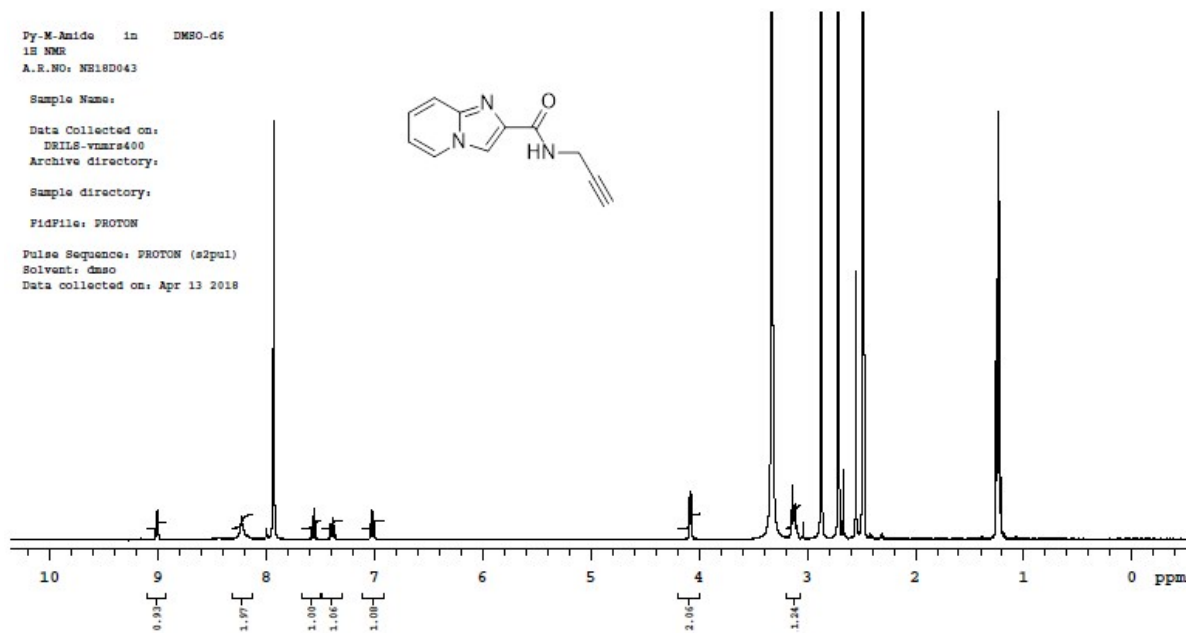

Figure S1. <sup>1</sup>H-NMR Spectrum of Compound 3.

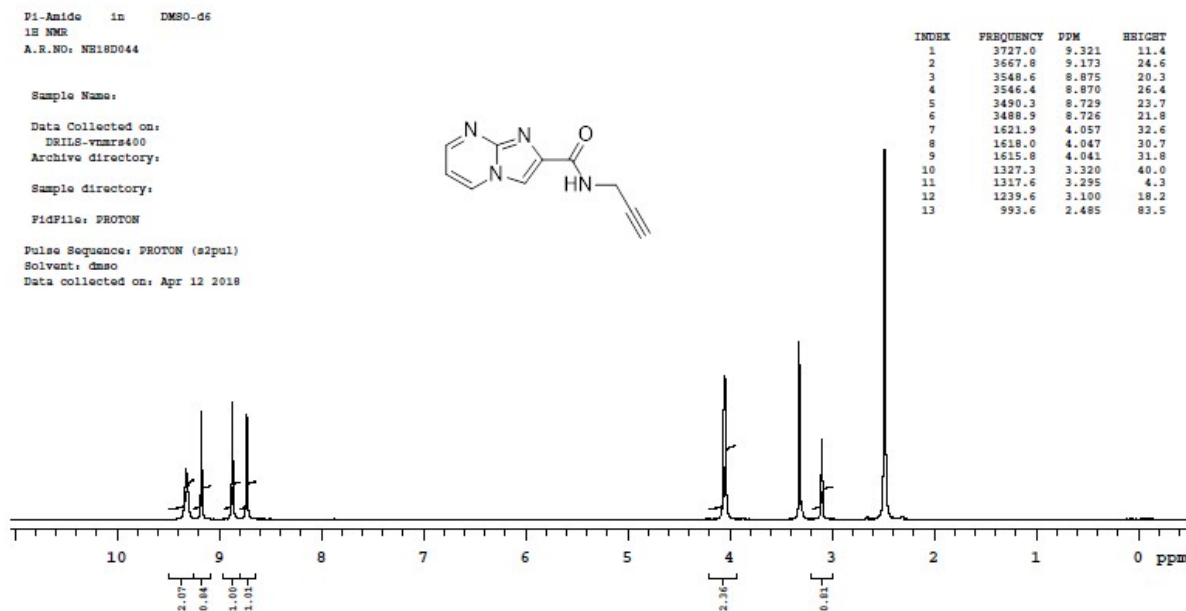

Figure S2. <sup>1</sup>H-NMR Spectrum of Compound 3a.

Sample Name T91 Position Vial 19 Instrument Name Instrument 1 User Name  
 Inj Vol 3 InjPosition SampleType Sample IRM Calibration Status Not Applicable  
 Data Filename 140217M020.d ACQ Method MASS.m Comment ME17B021 Acquired Time 2/14/2017 3:28:19 PM

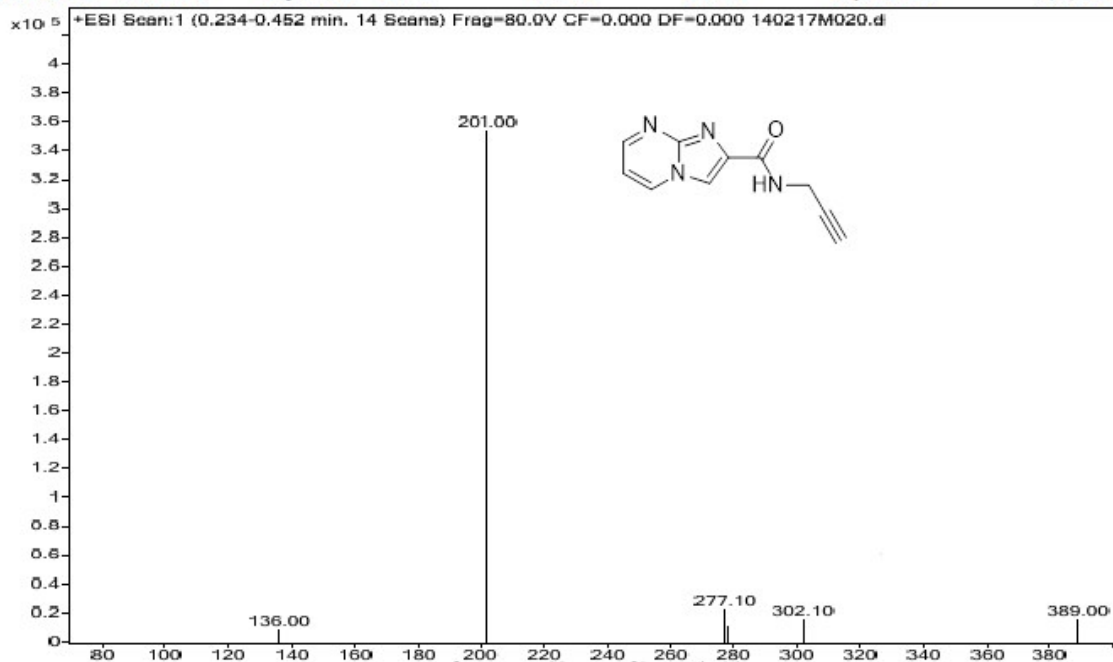

Figure S3. ESI-MS Spectrum of Compound 3a.

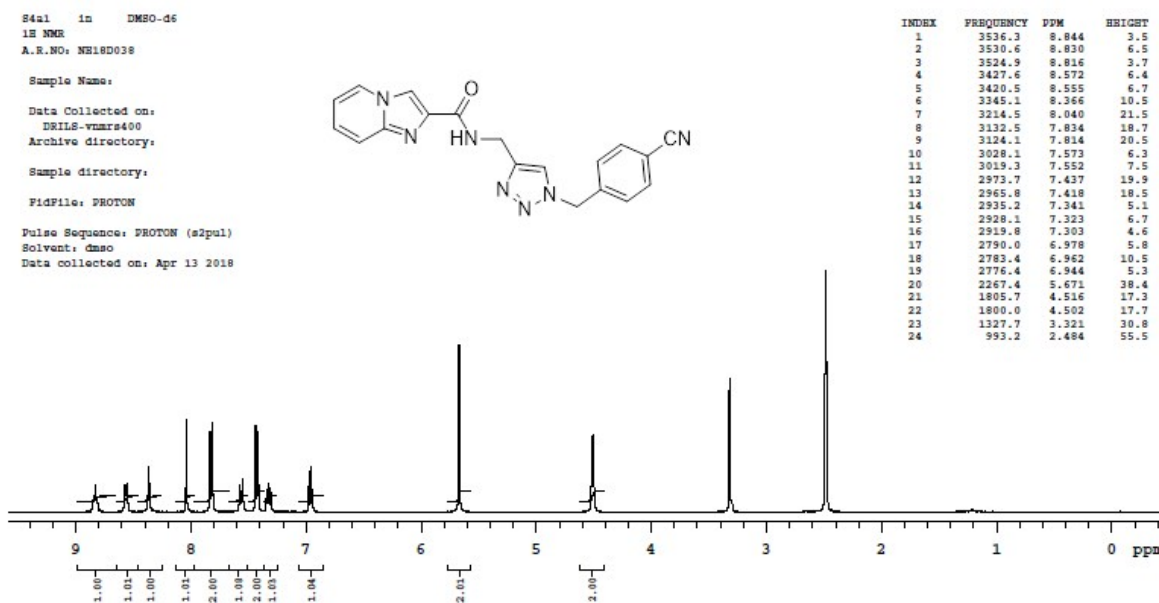

Figure S4. <sup>1</sup>H-NMR Spectrum of Compound 4a.

**Sample Name** S4a1      **Position** Vial 26      **Instrument Name** Instrument 1      **User Name**  
**Inj Vol** 1      **InjPosition**      **SampleType** Sample      **IRM Calibration Status** Not Applicable  
**Data Filename** 120118M006.d      **ACQ Method** ESI-SM.m      **Comment** ME18A015      **Acquired Time** 1/12/2018 10:08:48 AM

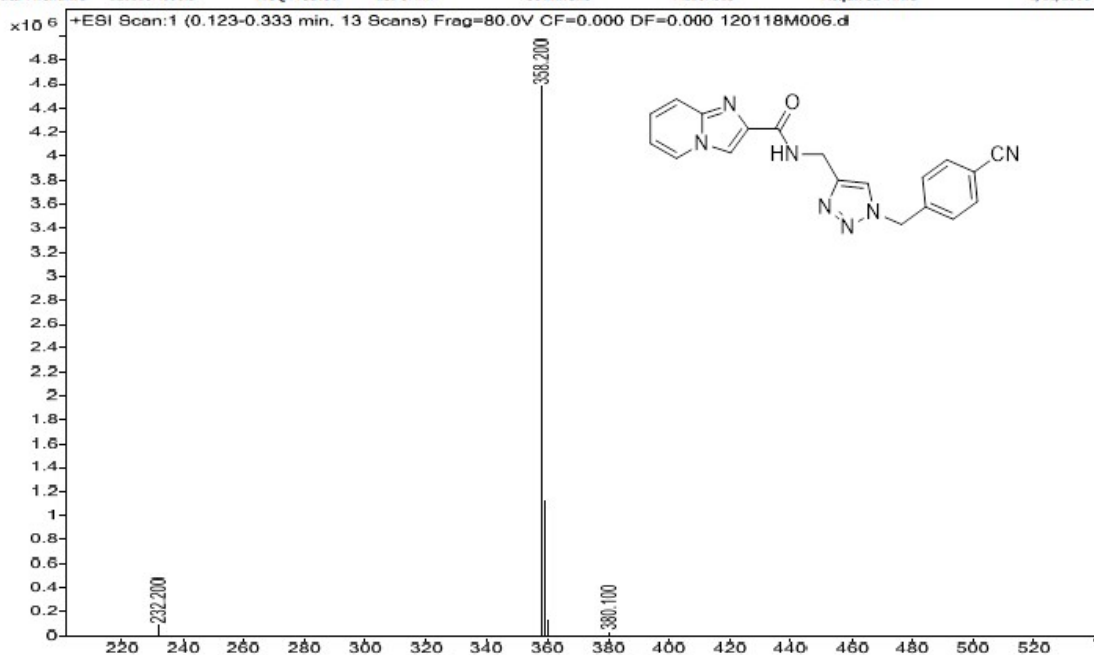

Figure S5. ESI-MS Spectrum of Compound 4a.

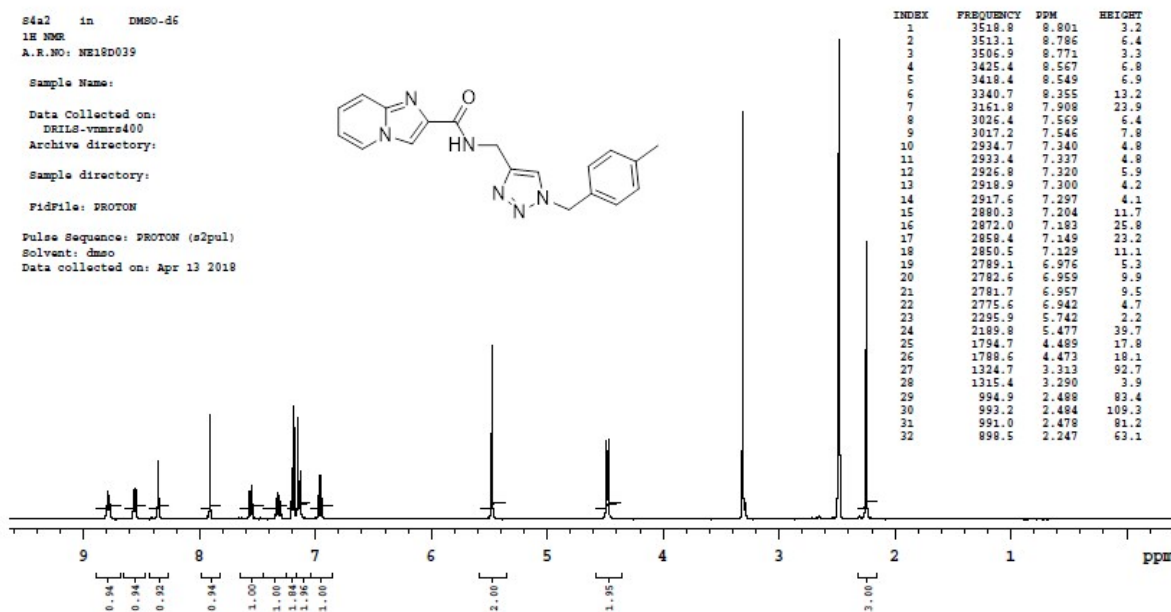

Figure S6. <sup>1</sup>H-NMR Spectrum of Compound 4b.

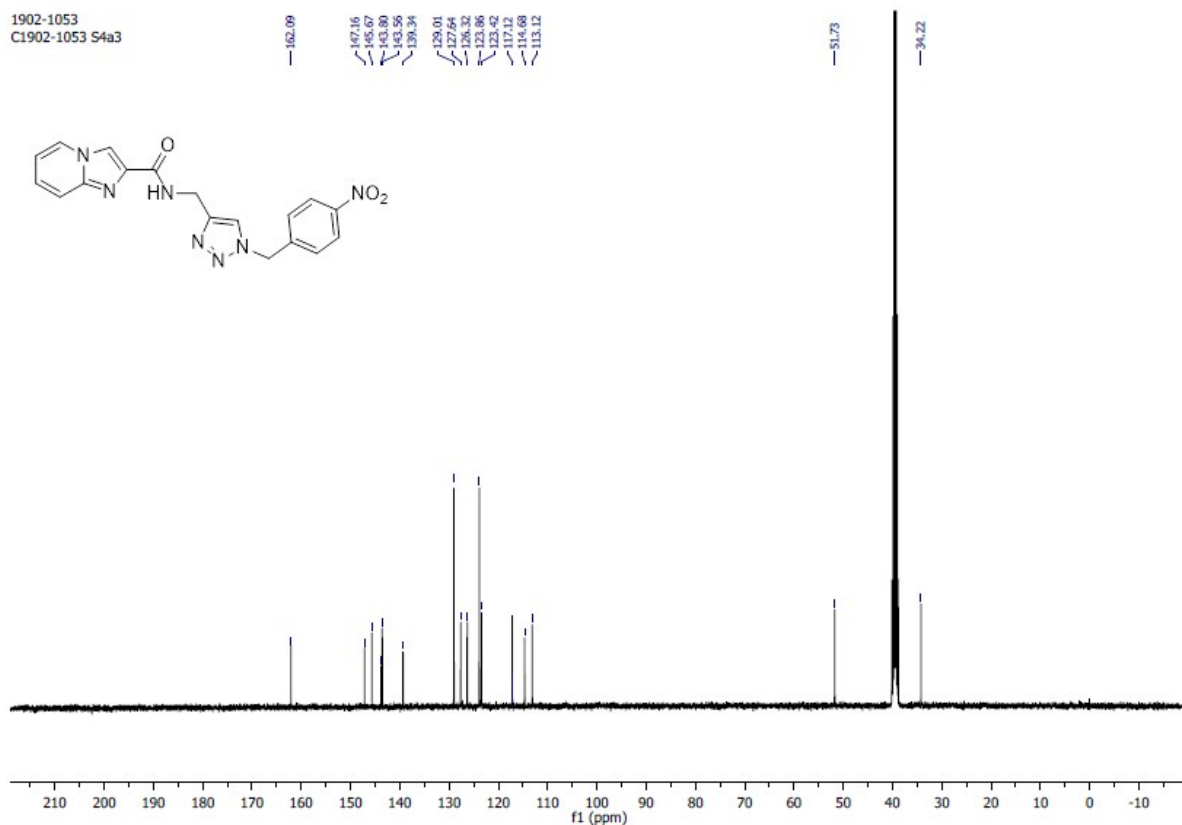

Figure S7.  $^{13}\text{C}$ -NMR Spectrum of Compound 4c.

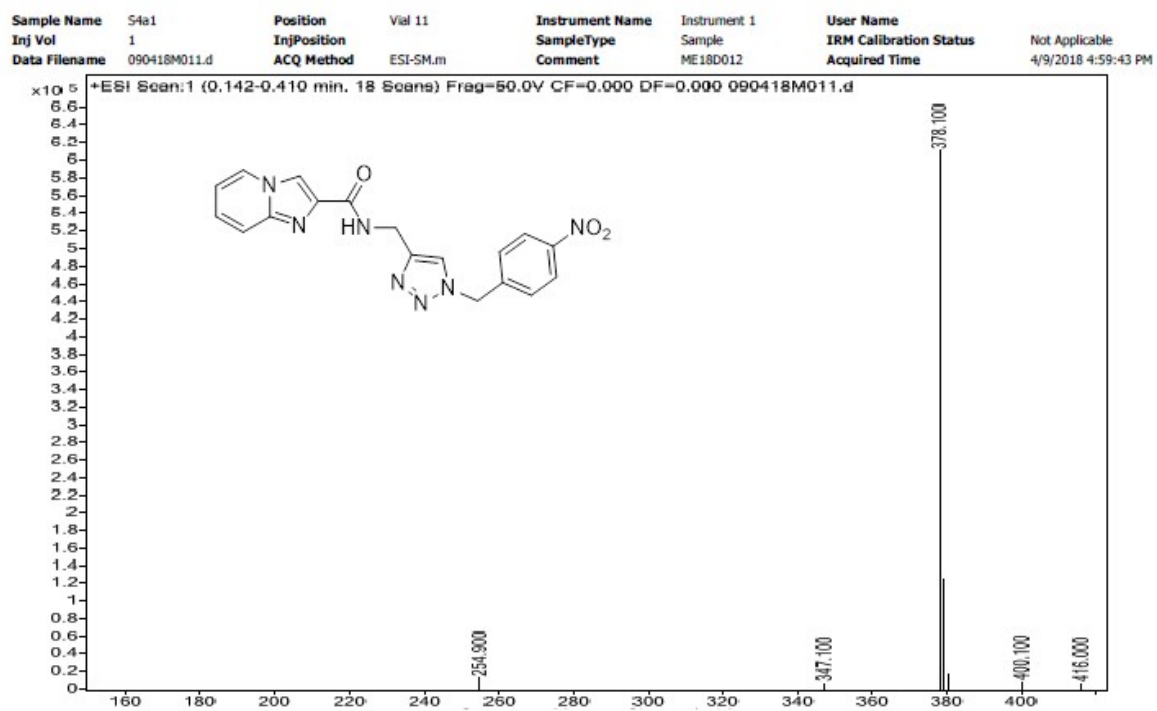

Figure S8. ESI-MS Spectrum of Compound 4c.



S4a4 in DMSO-d6  
 1H NMR  
 A.R.NO: NE18D033

Sample Name:

Data Collected on:  
 DRILS-vmr400

Archive directory:

Sample directory:

Fidfile: PROTON

Pulse Sequence: PROTON (s2pul)  
 Solvent: DMSO  
 Data collected on: Apr 12 2018

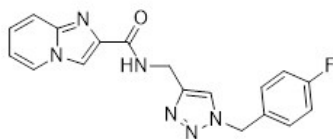

| INDEX | FREQUENCY | PPM   | HEIGHT |
|-------|-----------|-------|--------|
| 1     | 3528.0    | 8.824 | 5.8    |
| 2     | 3431.9    | 8.583 | 5.3    |
| 3     | 3353.5    | 8.387 | 3.9    |
| 4     | 3188.2    | 7.974 | 23.9   |
| 5     | 3024.2    | 7.564 | 5.6    |
| 6     | 2952.3    | 7.384 | 17.0   |
| 7     | 2944.4    | 7.364 | 25.7   |
| 8     | 2938.7    | 7.350 | 23.4   |
| 9     | 2929.5    | 7.327 | 11.4   |
| 10    | 2877.3    | 7.196 | 19.0   |
| 11    | 2868.5    | 7.174 | 31.1   |
| 12    | 2859.7    | 7.152 | 15.1   |
| 13    | 2789.6    | 6.977 | 9.5    |
| 14    | 2783.0    | 6.960 | 16.1   |
| 15    | 2776.4    | 6.944 | 8.3    |
| 16    | 2211.7    | 5.532 | 60.5   |
| 17    | 1798.2    | 4.497 | 22.4   |
| 18    | 1793.4    | 4.485 | 22.7   |

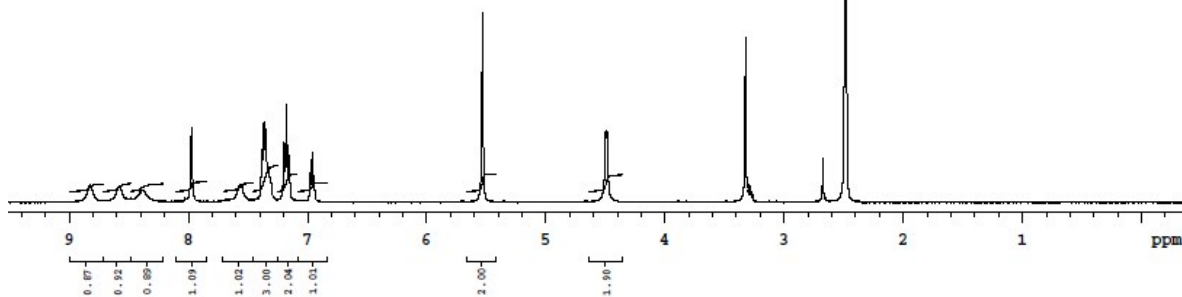

Figure S9. <sup>1</sup>H-NMR Spectrum of Compound 4d.

| Sample Name   | T-74a        | Position    | Vial 14 | Instrument Name | Instrument 1 | User Name              |                        |
|---------------|--------------|-------------|---------|-----------------|--------------|------------------------|------------------------|
| Inj Vol       | 2            | InjPosition |         | SampleType      | Sample       | IRM Calibration Status | Not Applicable         |
| Data Filename | 161216M018.d | ACQ Method  | MASS.m  | Comment         | ME16L056     | Acquired Time          | 12/16/2016 10:51:57 AM |

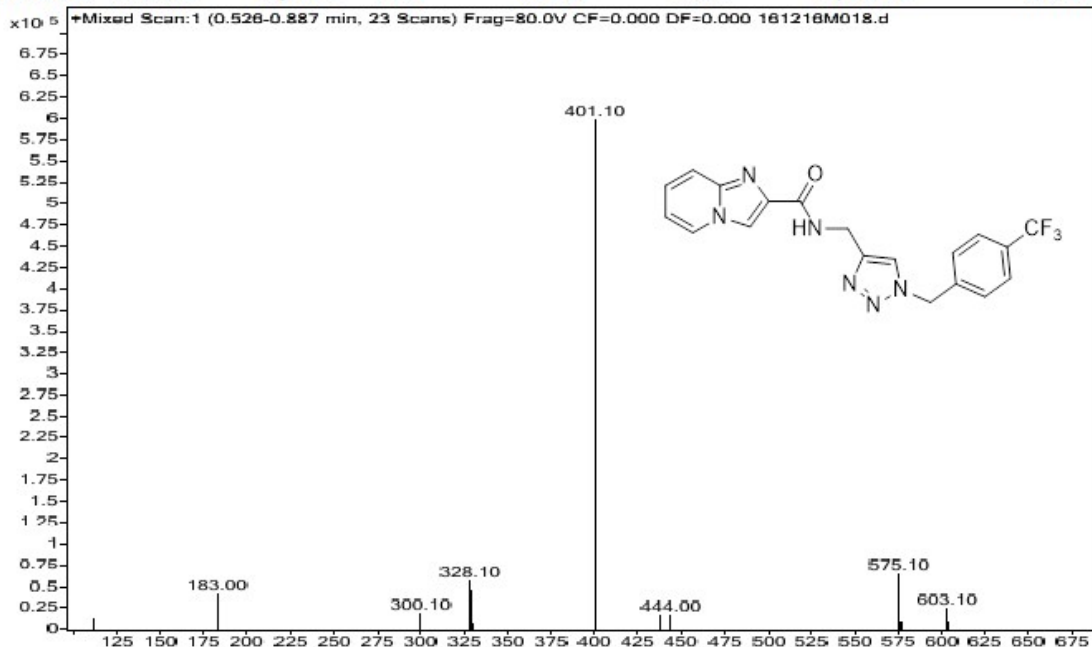

Figure S10. ESI-MS Spectrum of Compound 4e.

|               |              |             |         |                 |              |                        |                      |
|---------------|--------------|-------------|---------|-----------------|--------------|------------------------|----------------------|
| Sample Name   | T95          | Position    | Vial 23 | Instrument Name | Instrument 1 | User Name              |                      |
| Inj Vol       | 3            | InjPosition |         | SampleType      | Sample       | IRM Calibration Status | Not Applicable       |
| Data Filename | 140217M024.d | ACQ Method  | MASS.m  | Comment         | ME17B025     | Acquired Time          | 2/14/2017 3:44:21 PM |

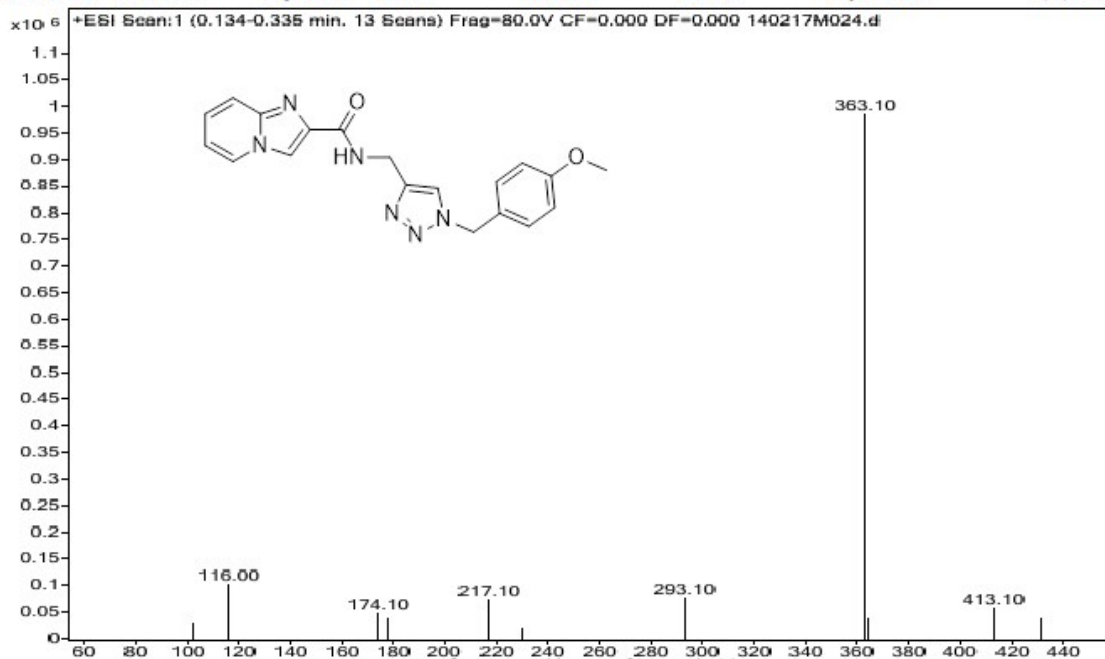

Figure S11. ESI-MS Spectrum of Compound 4f.

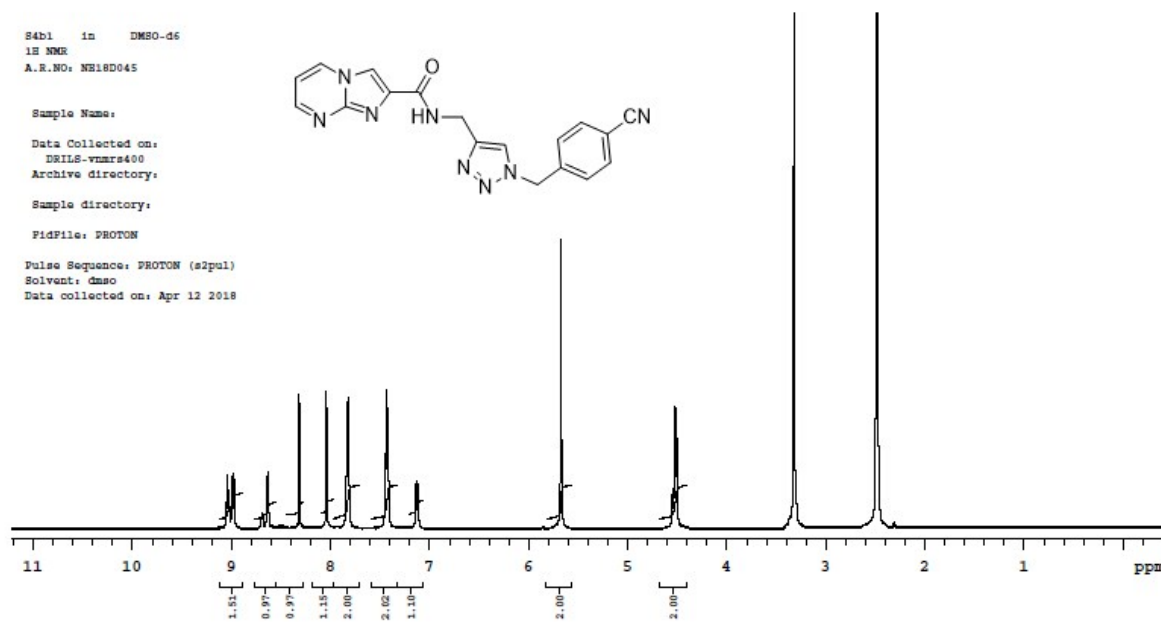

Figure S12. <sup>1</sup>H-NMR Spectrum of Compound 4j.

|               |              |             |          |                 |              |                        |                       |
|---------------|--------------|-------------|----------|-----------------|--------------|------------------------|-----------------------|
| Sample Name   | S4b1         | Position    | Vial 27  | Instrument Name | Instrument 1 | User Name              |                       |
| Inj Vol       | 1            | InjPosition |          | SampleType      | Sample       | IRM Calibration Status | Not Applicable        |
| Data Filename | 120118M007.d | ACQ Method  | ESI-SM.m | Comment         | ME18A016     | Acquired Time          | 1/12/2018 10:11:45 AM |

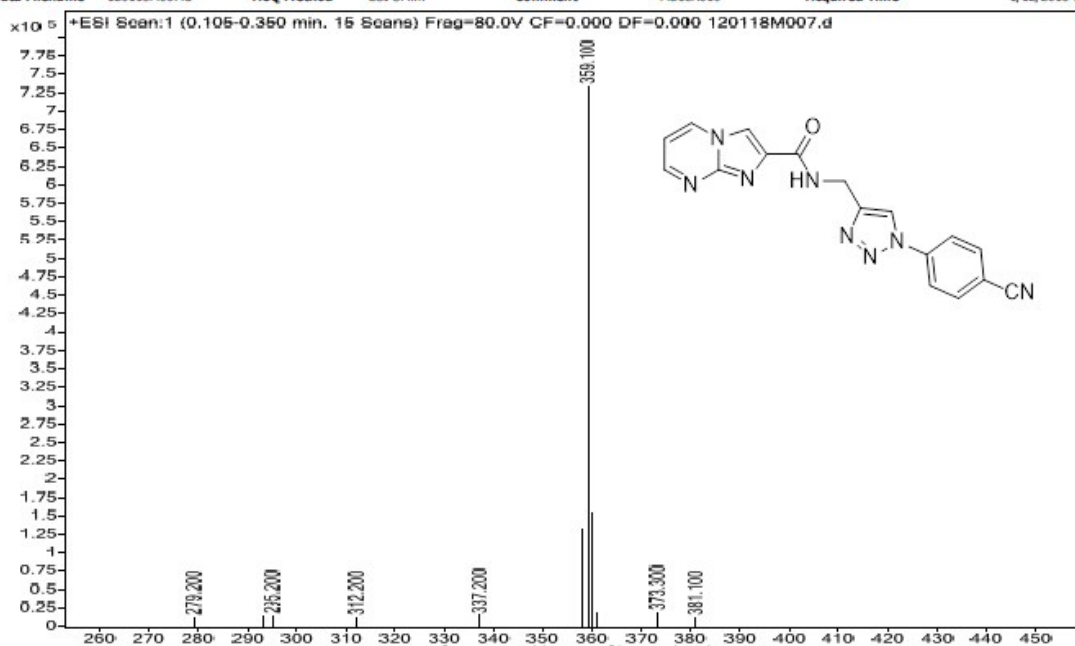

Figure S13. ESI-MS Spectrum of Compound 4j.

|               |              |             |          |                 |              |                        |                     |
|---------------|--------------|-------------|----------|-----------------|--------------|------------------------|---------------------|
| Sample Name   | S4b3         | Position    | Vial 9   | Instrument Name | Instrument 1 | User Name              |                     |
| Inj Vol       | 1            | InjPosition |          | SampleType      | Sample       | IRM Calibration Status | Not Applicable      |
| Data Filename | 090418M009.d | ACQ Method  | ESI-SM.m | Comment         | ME18D010     | Acquired Time          | 4/9/2018 4:55:43 PM |

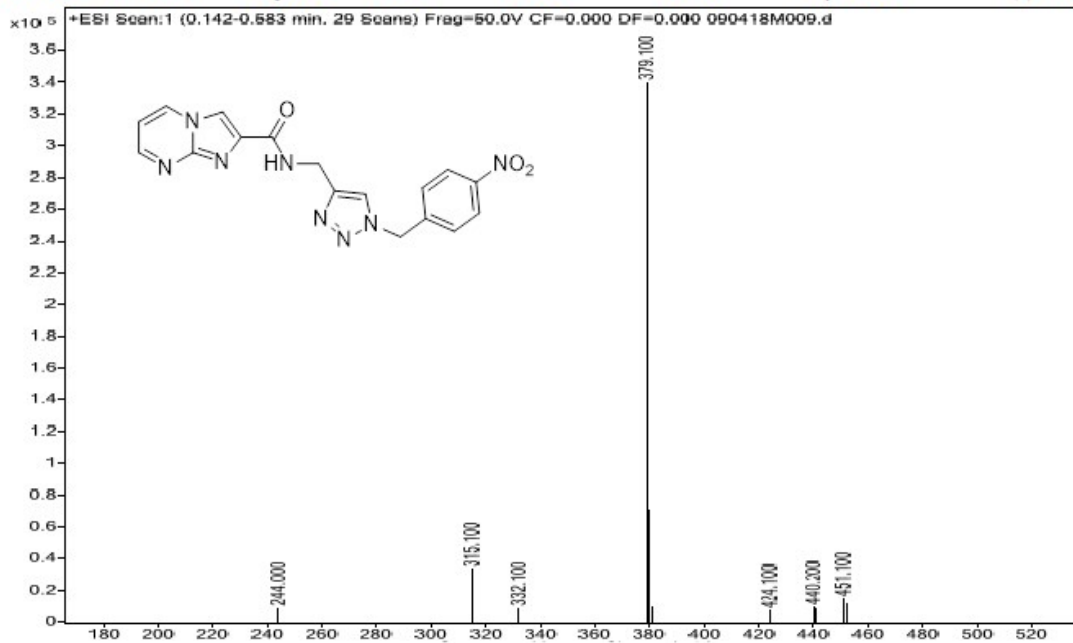

Figure S14. ESI-MS Spectrum of Compound 4l.

S4b4 in DMSO-d6  
1H NMR  
A.R.NO: NH18D042  
Sample Name:  
Data Collected on:  
DRILS-vnmrs400  
Archive directory:  
Sample directory:  
FidFile: PROTON  
Pulse Sequence: PROTON (s2pul)  
Solvent: dmsd  
Data collected on: Apr 13 2018

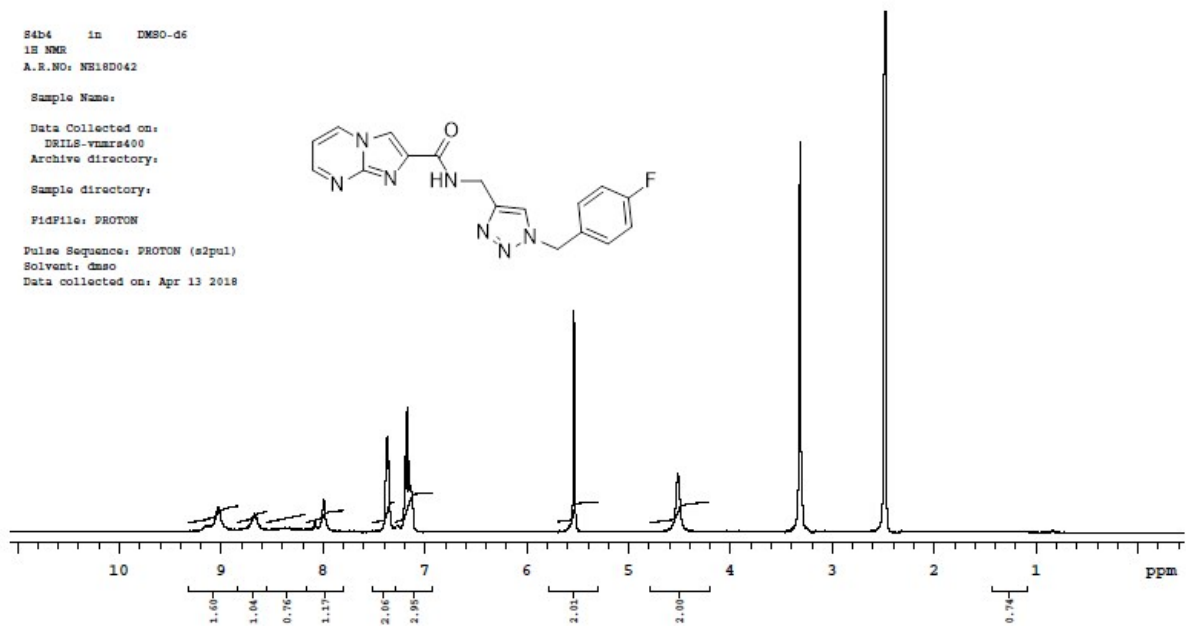

Figure S15. <sup>1</sup>H-NMR Spectrum of Compound 4m.

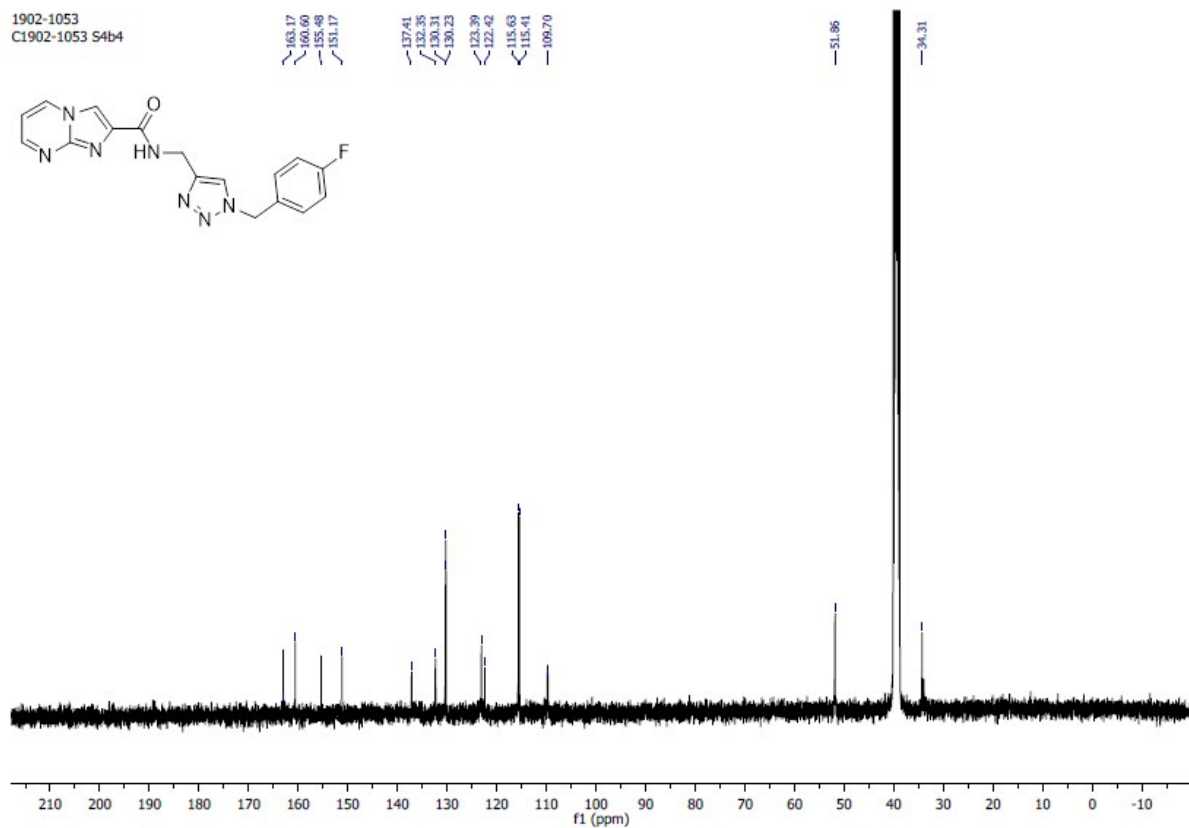

Figure S16. <sup>13</sup>C-NMR Spectrum of Compound 4m.

| Sample Name   | T95          | Position    | Vial 23 | Instrument Name | Instrument 1 | User Name              |                      |
|---------------|--------------|-------------|---------|-----------------|--------------|------------------------|----------------------|
| Inj Vol       | 3            | InjPosition |         | SampleType      | Sample       | IRM Calibration Status | Not Applicable       |
| Data Filename | 140217M024.d | ACQ Method  | MASS.m  | Comment         | ME17B025     | Acquired Time          | 2/14/2017 3:44:21 PM |

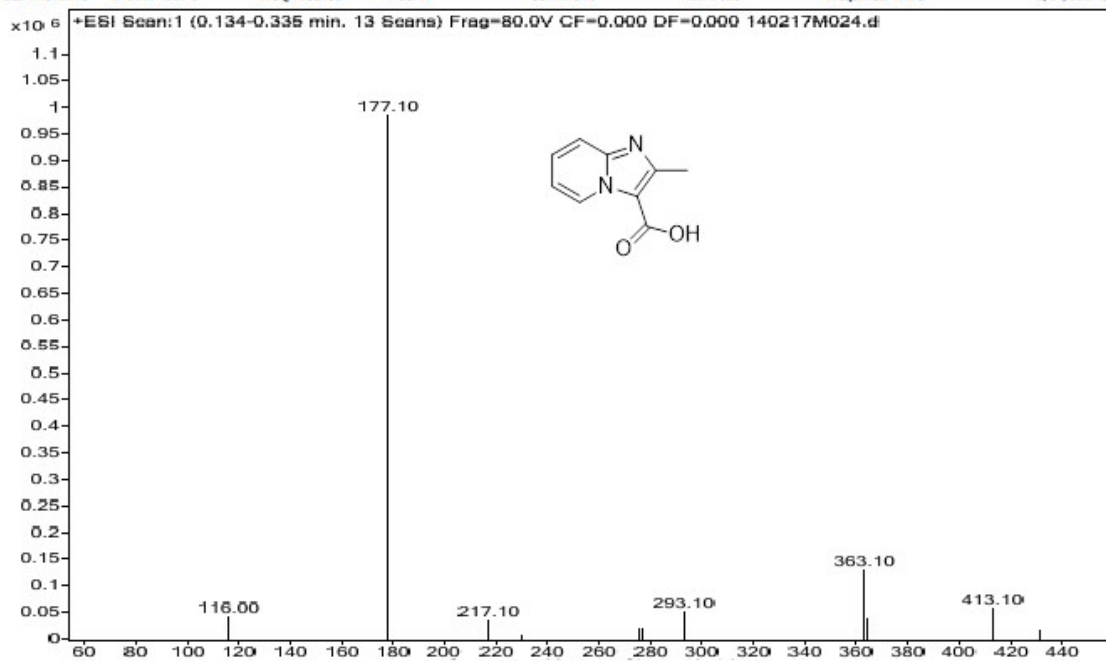

Figure S17. ESI-MS Spectrum of Compound 6.

| Sample Name   | PTC1         | Position    | Vial 21 | Instrument Name | Instrument 1 | User Name              |                      |
|---------------|--------------|-------------|---------|-----------------|--------------|------------------------|----------------------|
| Inj Vol       | 1            | InjPosition |         | SampleType      | Sample       | IRM Calibration Status | Not Applicable       |
| Data Filename | 140317M020.d | ACQ Method  | MASS.m  | Comment         | ME17C019     | Acquired Time          | 3/14/2017 1:46:54 PM |

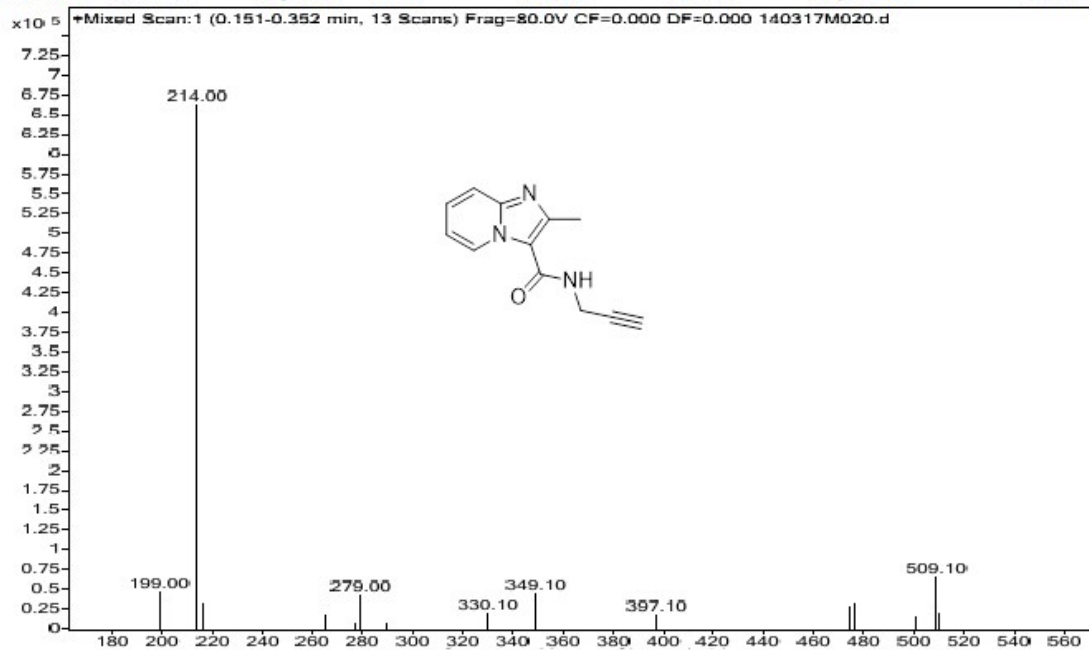

Figure S18. ESI-MS Spectrum of Compound 7.

Pi-M-Amide in DMSO-d6  
 1H NMR  
 A.R.NO: NH18D036  
 Sample Name:  
 Data Collected on:  
 BRILS-vnmrs400  
 Archive directory:  
 Sample directory:  
 FidFile: PROTON  
 Pulse Sequence: PROTON (s2pul)  
 Solvent: dmsc  
 Data collected on: Apr 13 2018

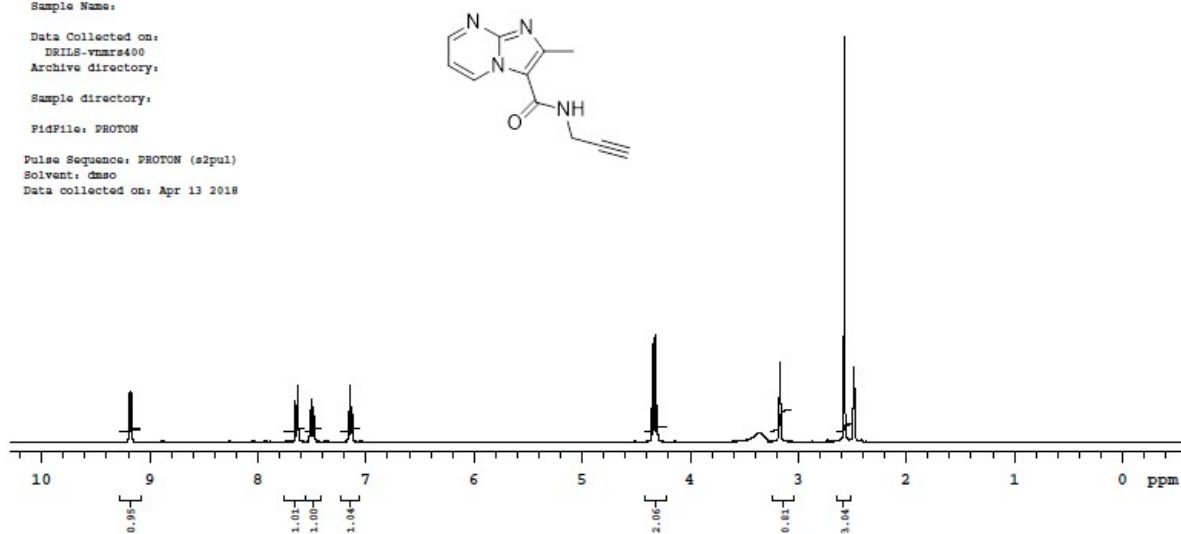

Figure S19. <sup>1</sup>H-NMR Spectrum of Compound 7a.

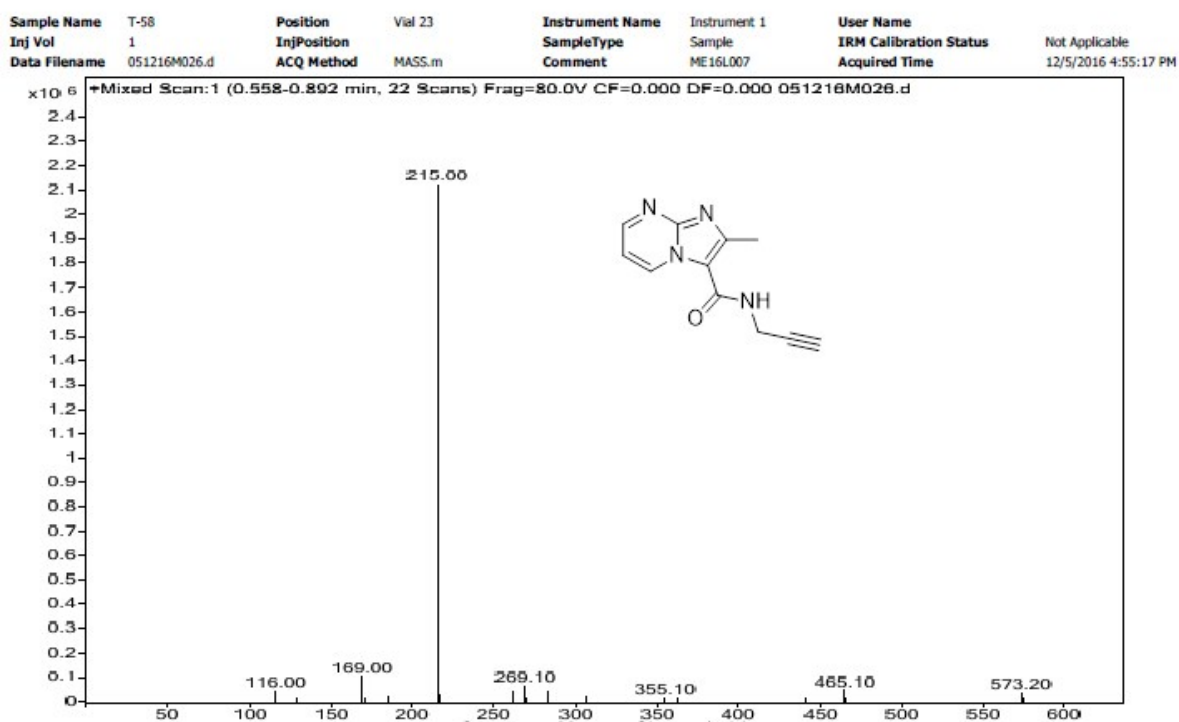

Figure S20. ESI-MS Spectrum of Compound 7a.

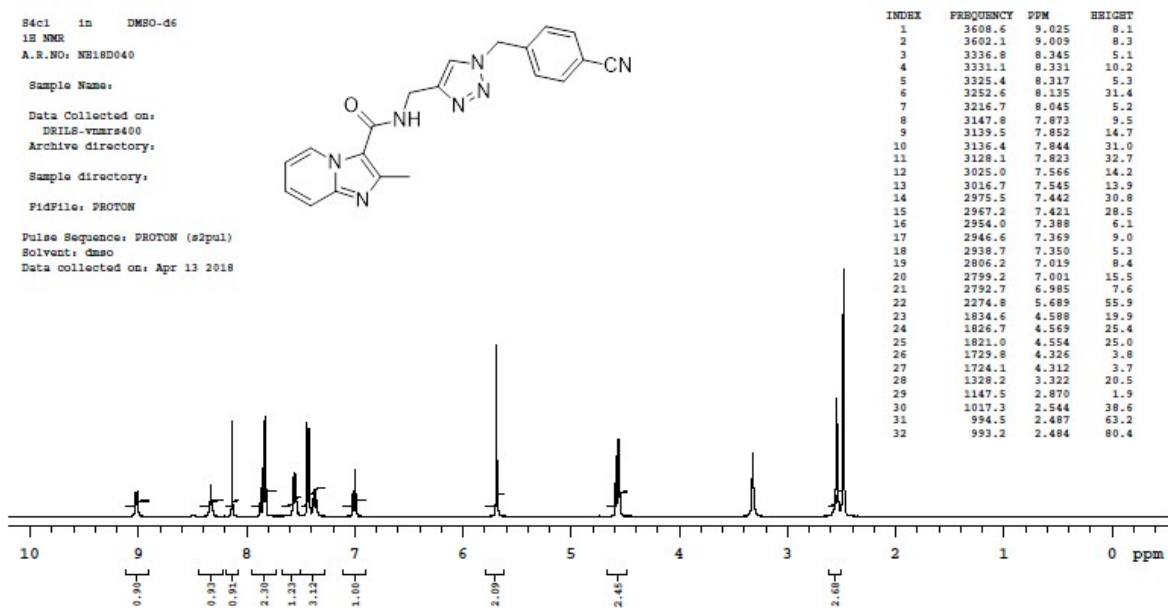

Figure S21. <sup>1</sup>H-NMR Spectrum of Compound 8a.

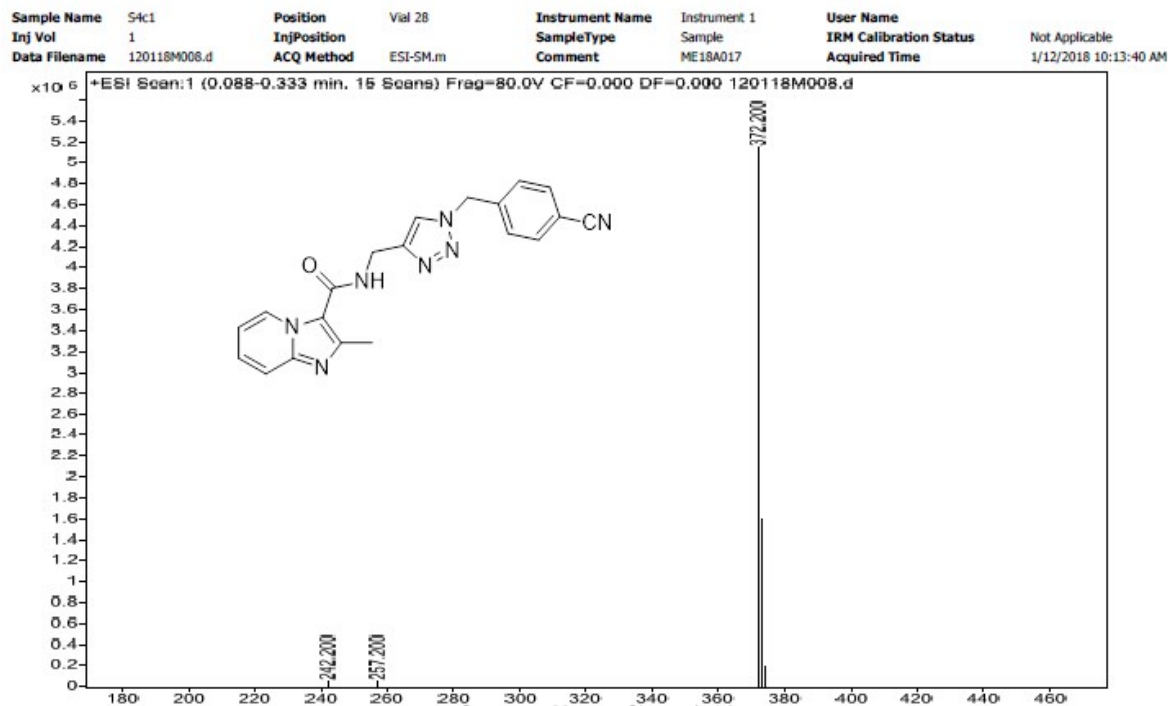

Figure S22. ESI-MS Spectrum of Compound 8a.

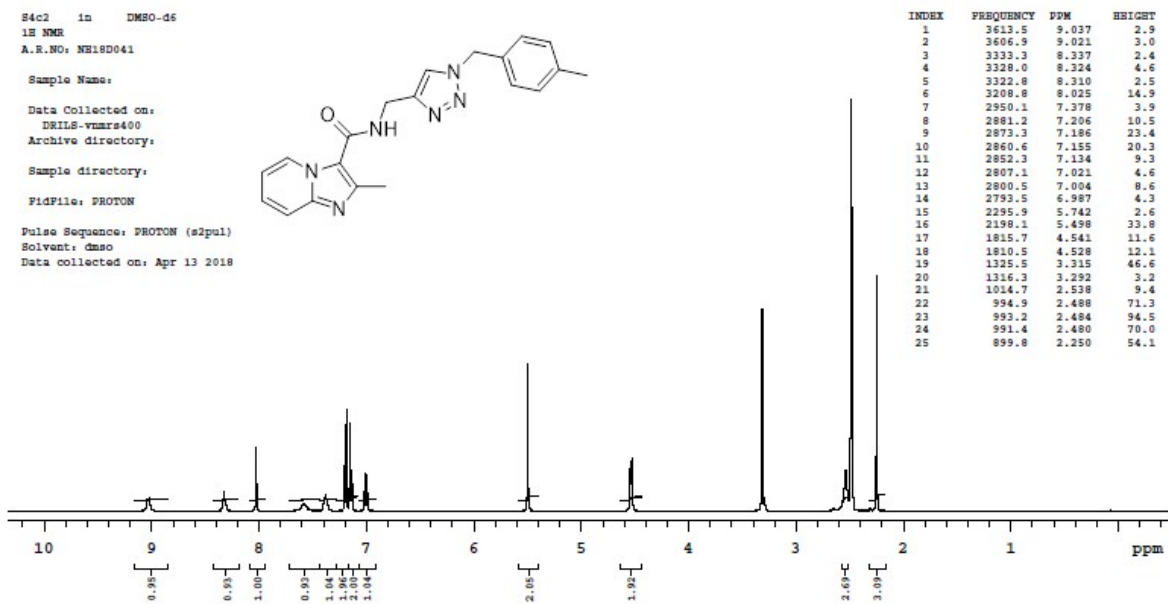

Figure S23. <sup>1</sup>H-NMR Spectrum of Compound **8b**.

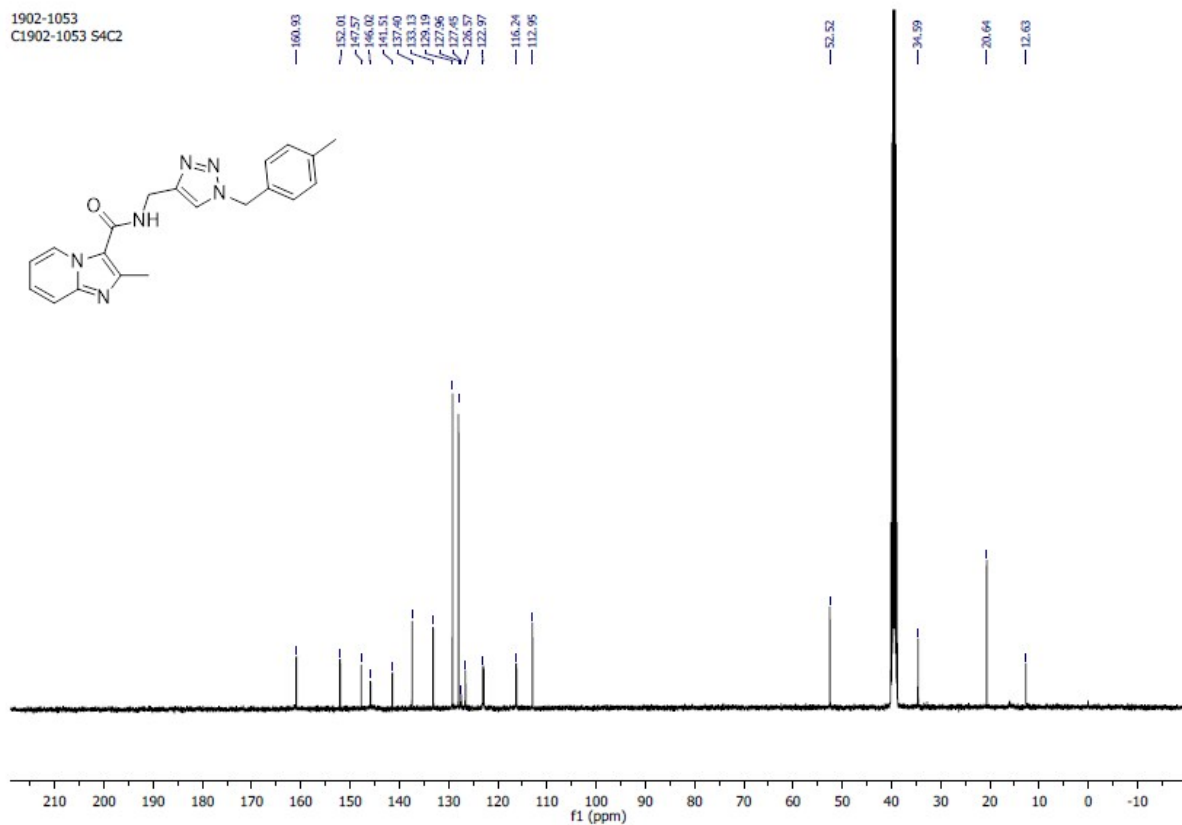

Figure S24. <sup>13</sup>C-NMR Spectrum of Compound **8b**.



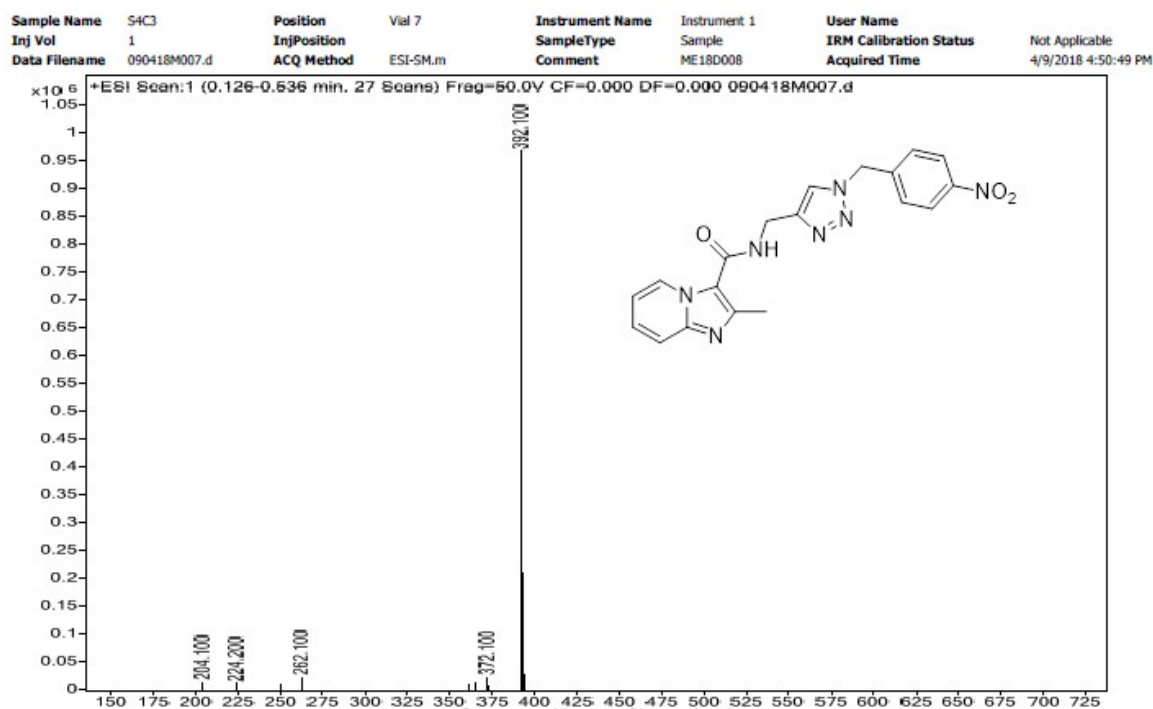

Figure S25. ESI-MS Spectrum of Compound 8c.

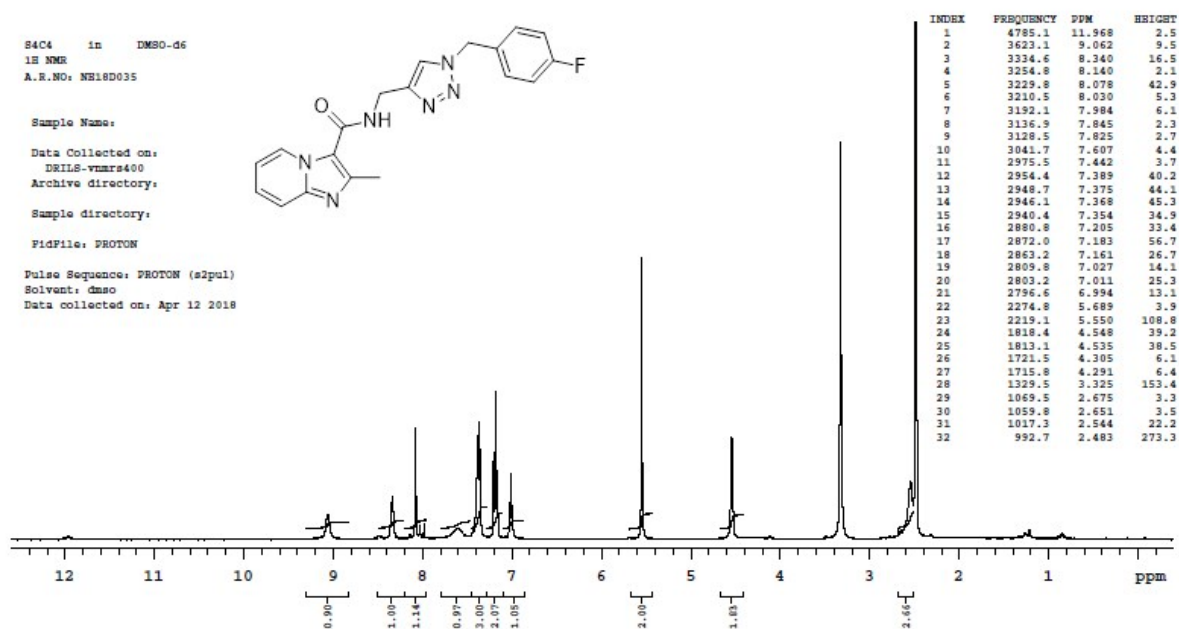

Figure S26. <sup>1</sup>H-NMR Spectrum of Compound 8d.

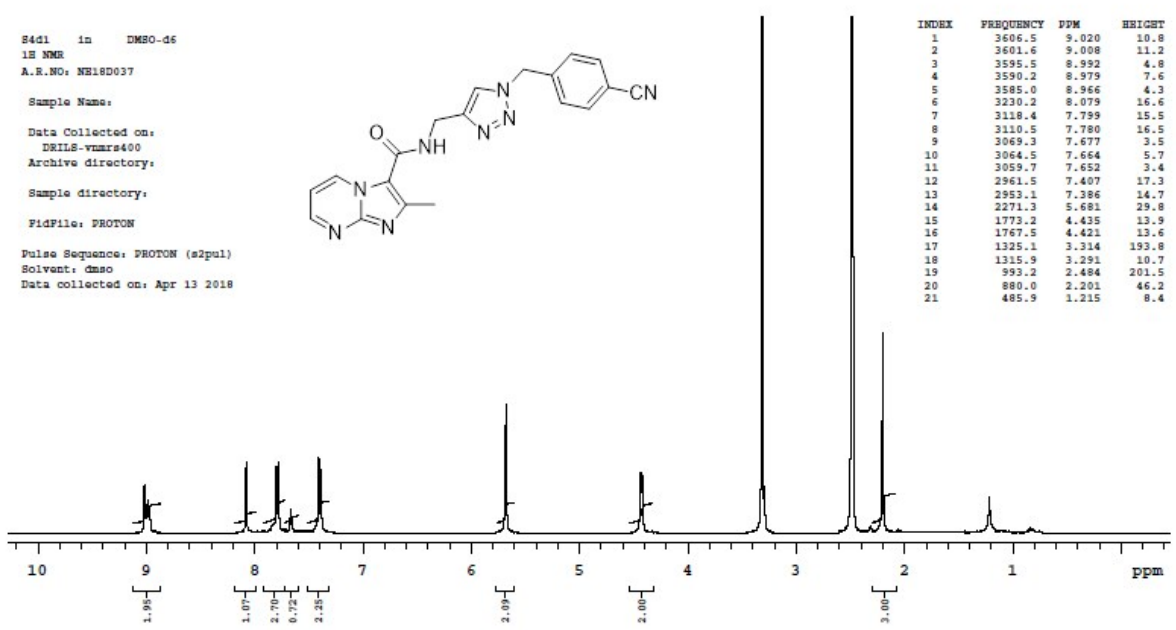

Figure S27. <sup>1</sup>H-NMR Spectrum of Compound 8j.

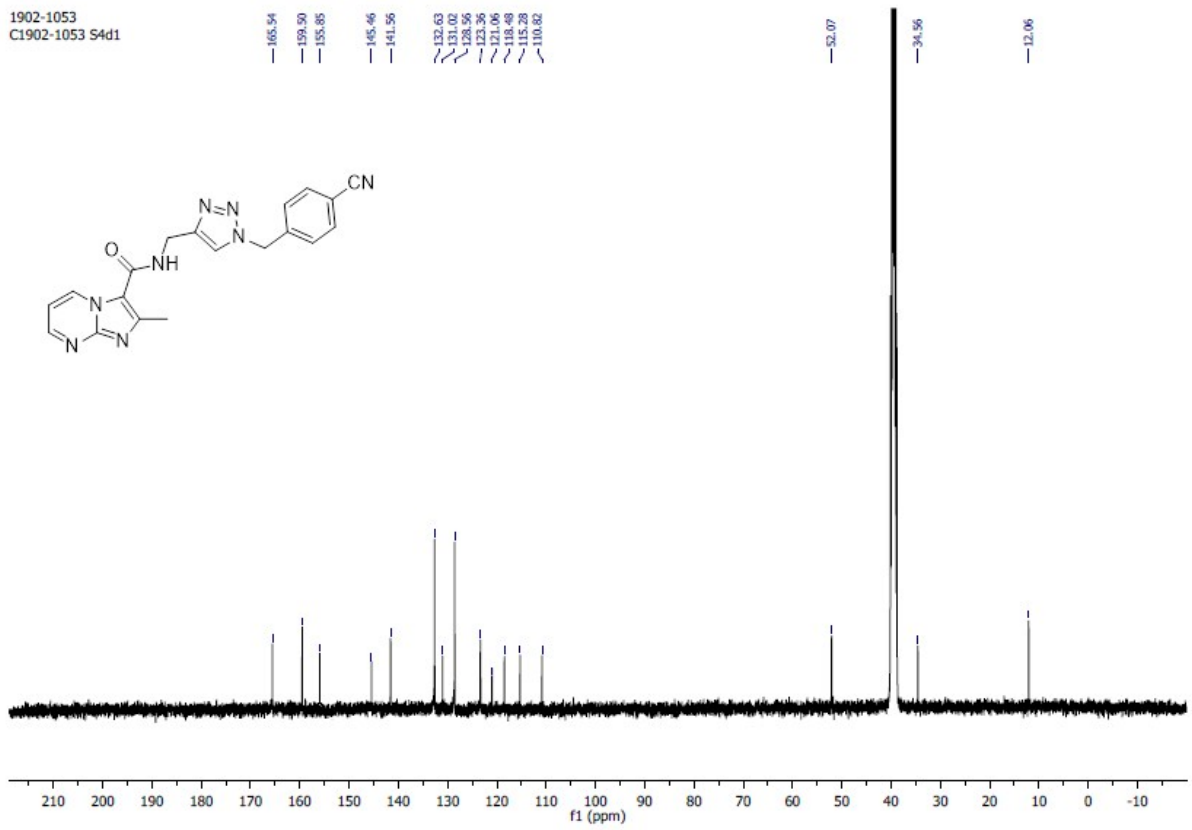

Figure S28. <sup>13</sup>C-NMR Spectrum of Compound 8j.

|               |              |             |          |                 |              |                        |                       |
|---------------|--------------|-------------|----------|-----------------|--------------|------------------------|-----------------------|
| Sample Name   | S4d1         | Position    | Vial 29  | Instrument Name | Instrument 1 | User Name              |                       |
| Inj Vol       | 1            | InjPosition |          | SampleType      | Sample       | IRM Calibration Status | Not Applicable        |
| Data Filename | 120118M009.d | ACQ Method  | ESI-SM.m | Comment         | ME18A018     | Acquired Time          | 1/12/2018 10:15:37 AM |

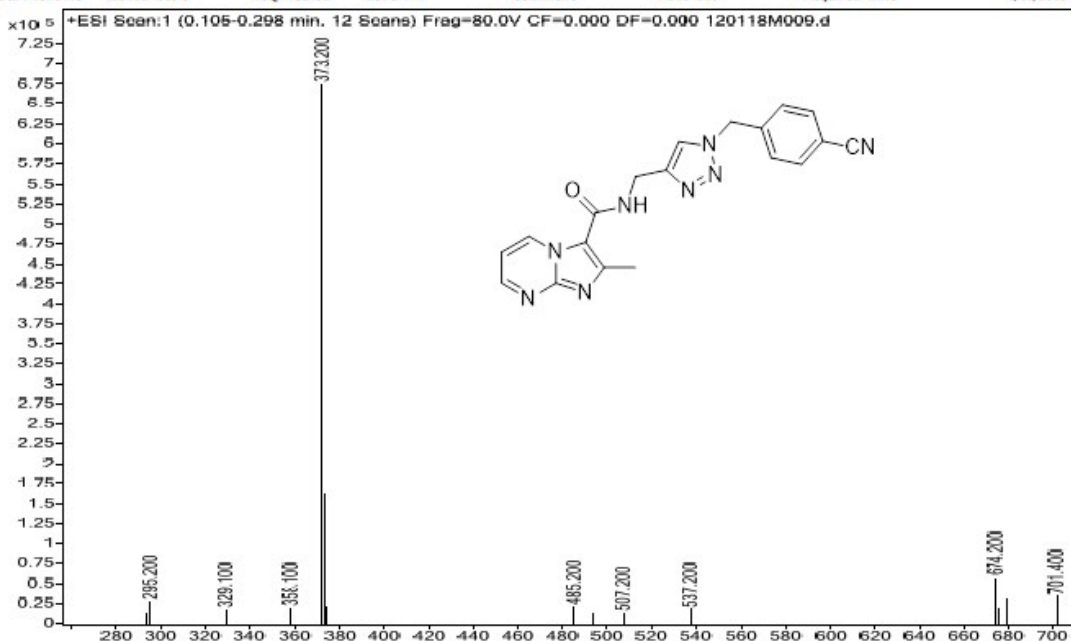

Figure S29. ESI-MS Spectrum of Compound 8j.

|               |              |             |         |                 |              |                        |                      |
|---------------|--------------|-------------|---------|-----------------|--------------|------------------------|----------------------|
| Sample Name   | PMA1         | Position    | Vial 72 | Instrument Name | Instrument 1 | User Name              |                      |
| Inj Vol       | 1            | InjPosition |         | SampleType      | Sample       | IRM Calibration Status | Not Applicable       |
| Data Filename | 100517M021.d | ACQ Method  | MASS.m  | Comment         | ME17E048     | Acquired Time          | 5/10/2017 2:55:43 PM |

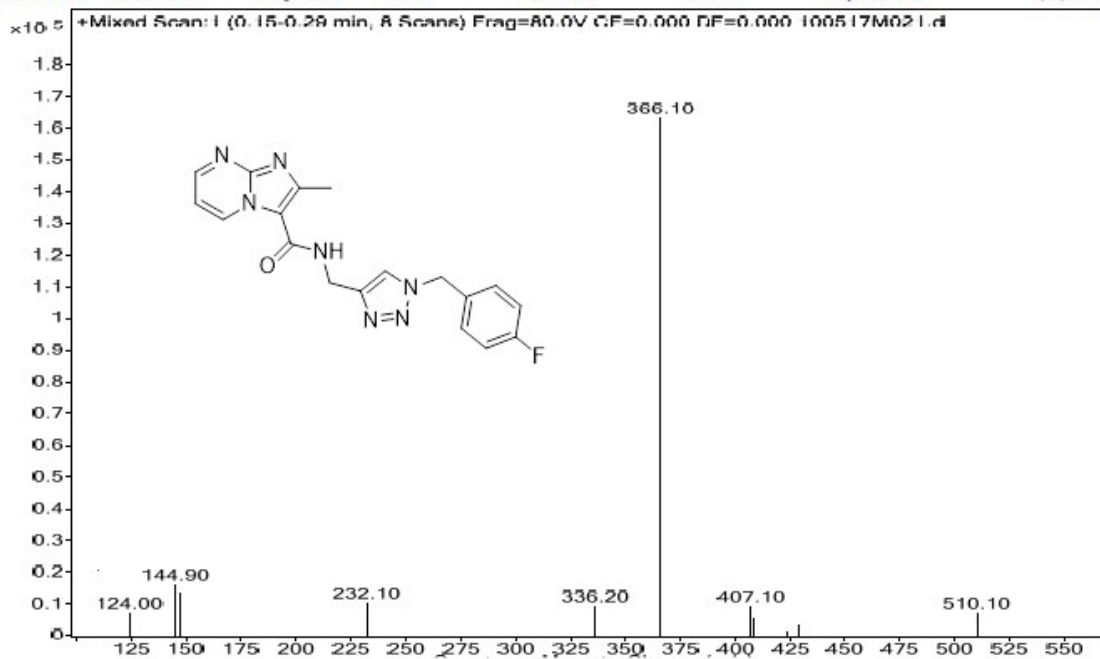

Figure S30. ESI-MS Spectrum of Compound 8m.

|               |              |             |         |                 |              |                        |                        |
|---------------|--------------|-------------|---------|-----------------|--------------|------------------------|------------------------|
| Sample Name   | T-69         | Position    | Vial 17 | Instrument Name | Instrument 1 | User Name              |                        |
| Inj Vol       | 2            | InjPosition |         | SampleType      | Sample       | IRM Calibration Status | Not Applicable         |
| Data Filename | 161216M021.d | ACQ Method  | MASS.m  | Comment         | ME16L059     | Acquired Time          | 12/16/2016 10:59:20 AM |

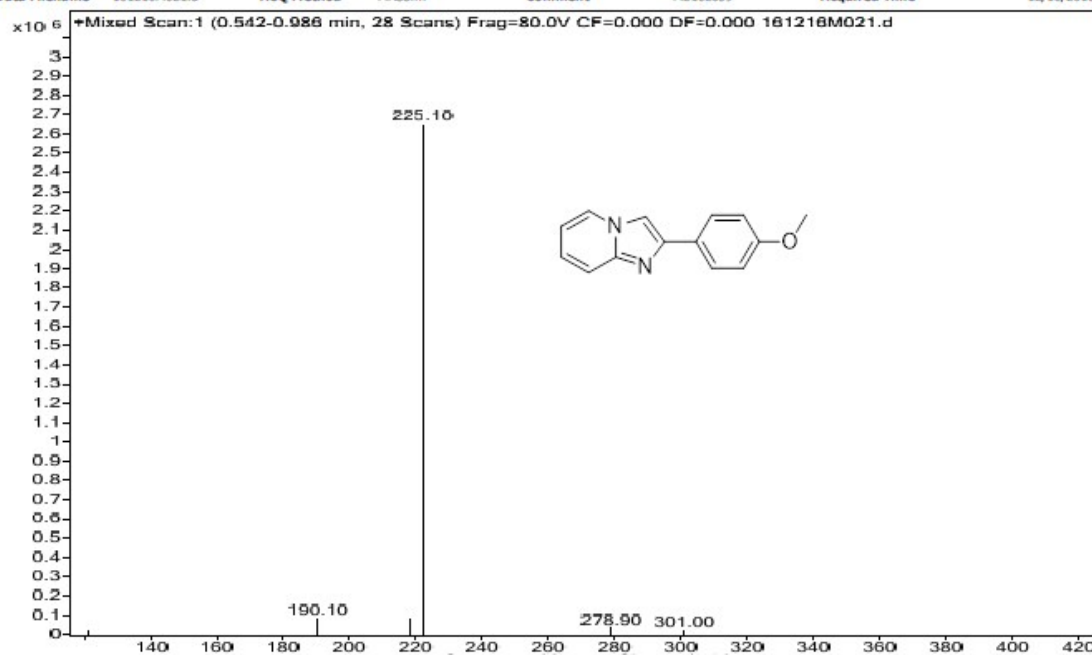

Figure S31. ESI-MS Spectrum of Compound 9.

|               |              |             |          |                 |              |                        |                      |
|---------------|--------------|-------------|----------|-----------------|--------------|------------------------|----------------------|
| Sample Name   | PY-Ald       | Position    | Vial 28  | Instrument Name | Instrument 1 | User Name              |                      |
| Inj Vol       | 1            | InjPosition |          | SampleType      | Sample       | IRM Calibration Status | Not Applicable       |
| Data Filename | 280817M008.d | ACQ Method  | ESI-SM.m | Comment         | MM17H016     | Acquired Time          | 8/28/2017 3:39:58 PM |

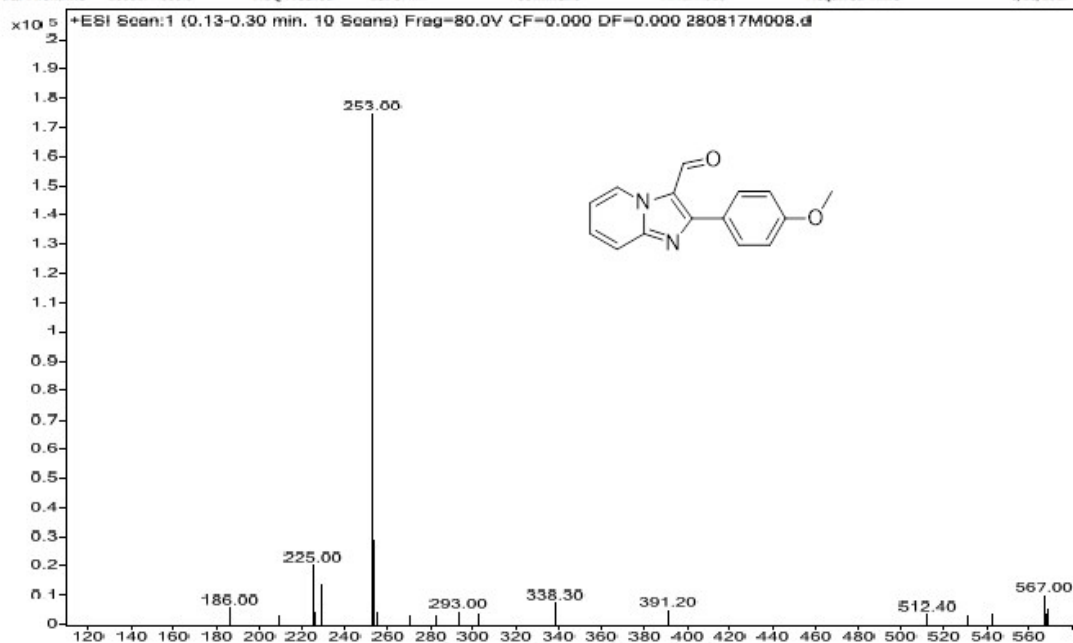

Figure S32. ESI-MS Spectrum of Compound 10.

Sample Name T103 Position Vial 30 Instrument Name Instrument 1 User Name  
 Inj Vol 3 InjPosition SampleType Sample IRM Calibration Status Not Applicable  
 Data Filename 140217M031.d ACQ Method MASS.m Comment ME17B032 Acquired Time 2/14/2017 4:09:18 PM

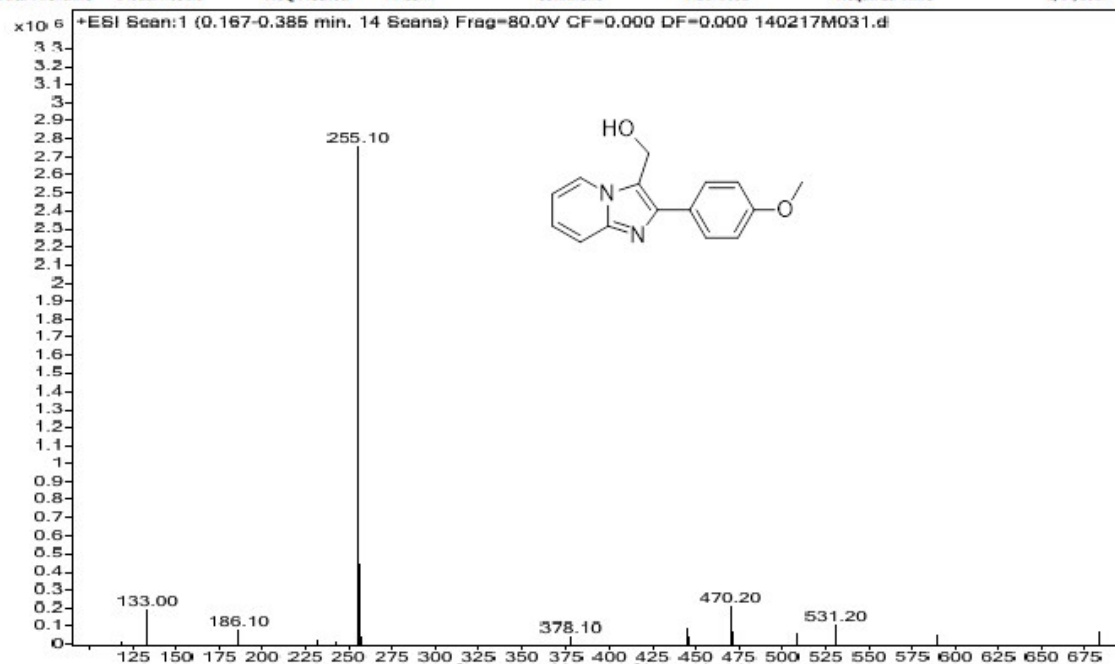

Figure S33. ESI-MS Spectrum of Compound 11.

Py-Ether in DMSO-d6  
 1H NMR  
 A.R.NO: NE18D032

Sample Name:

Data Collected on:  
 DRILLS-vnmrs400  
 Archive directory:

Sample directory:

FidFile: PROTON

Pulse Sequence: PROTON (s2pul)  
 Solvent: dmsc  
 Data collected on: Apr 12 2018

| INDEX | FREQUENCY | DDM   | BRIGHT |
|-------|-----------|-------|--------|
| 1     | 3366.2    | 8.419 | 11.5   |
| 2     | 3098.3    | 7.749 | 20.7   |
| 3     | 3099.1    | 7.751 | 20.8   |
| 4     | 3029.9    | 7.578 | 9.9    |
| 5     | 3024.2    | 7.564 | 10.3   |
| 6     | 2909.3    | 7.276 | 10.5   |
| 7     | 2816.8    | 7.045 | 21.7   |
| 8     | 2779.5    | 6.952 | 11.7   |
| 9     | 2142.0    | 5.357 | 11.6   |
| 10    | 1948.2    | 4.872 | 24.9   |
| 11    | 1518.0    | 3.797 | 47.2   |
| 12    | 1331.7    | 3.131 | 15.4   |

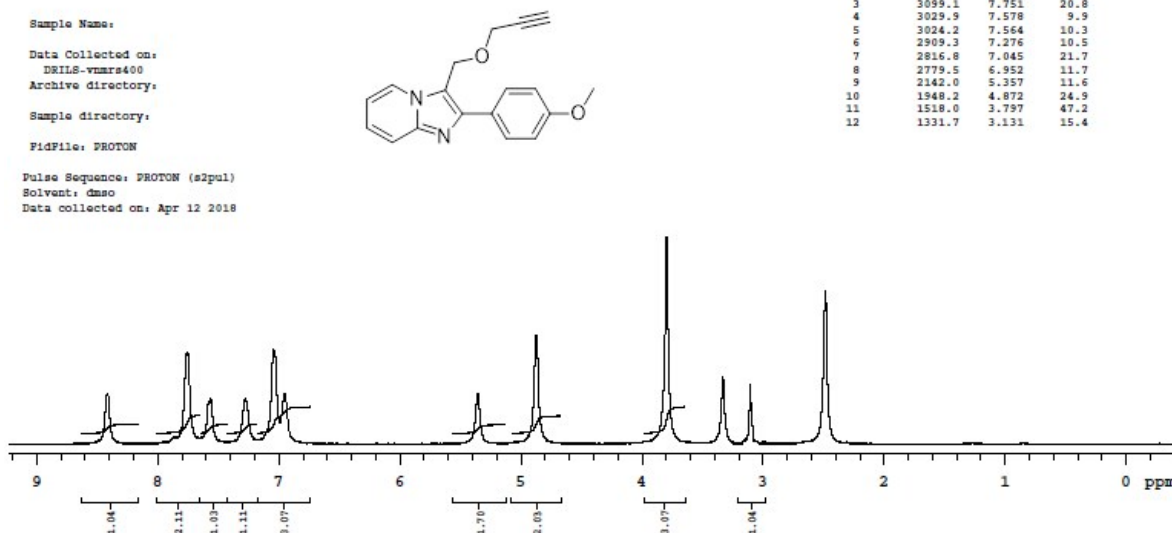

Figure S34. <sup>1</sup>H-NMR Spectrum of Compound 12.

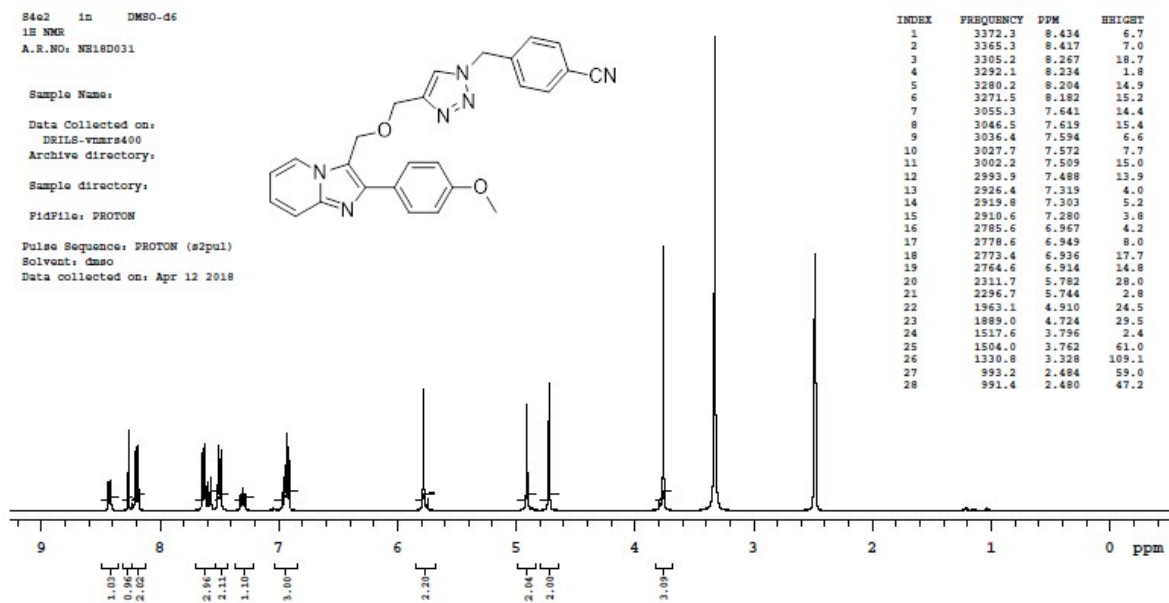

Figure S35. <sup>1</sup>H-NMR Spectrum of Compound 13a.

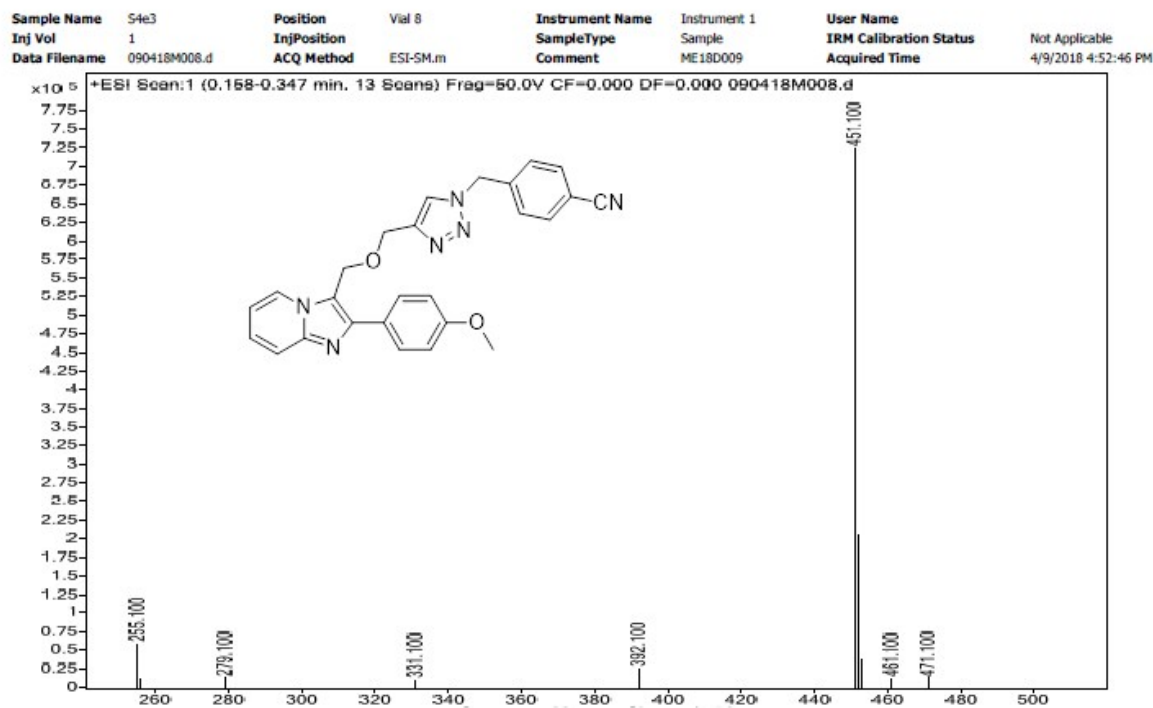

Figure S36. ESI-MS Spectrum of Compound 13a.

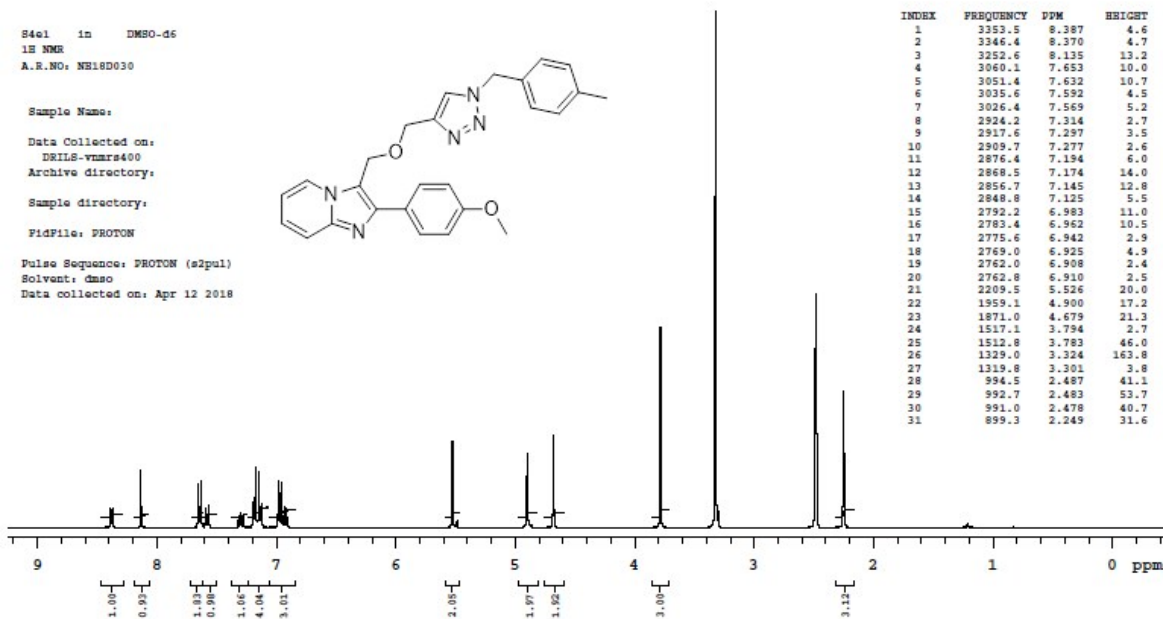

Figure S37. <sup>1</sup>H-NMR Spectrum of Compound 13b.

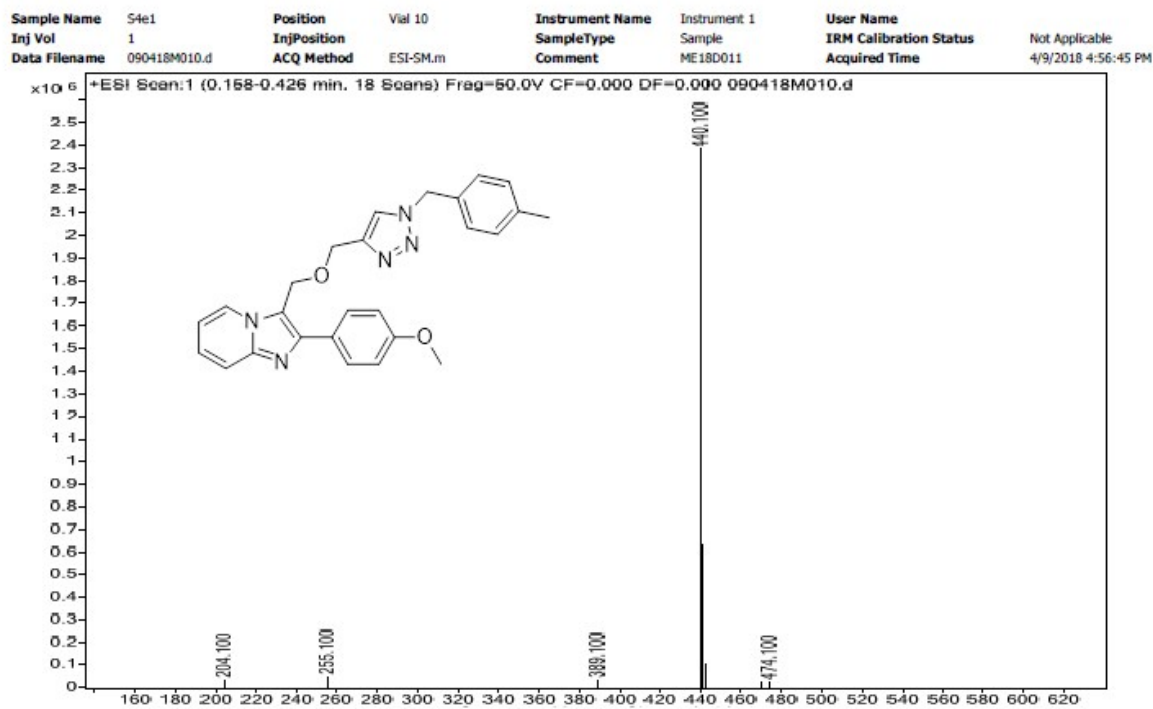

Figure S38. ESI-MS Spectrum of Compound 13b.
